# Supplementary material for: Healthcare-associated infections in home healthcare: an extensive assessment, 2019
Source: PubMed Central journal article supplement (PMC7863228; doi:10.2807/1560-7917.es.2021.26.5.1900646), 2021-02-04
Supplement: 1900646_Supplements.pdf [file 1900646_Supplements.pdf]

## Disclaimer

This supplementary material is hosted by Eurosurveillance as supporting information alongside the article “Healthcare associated infections in home healthcare: an extensive assessment”, on behalf of the authors, who remain responsible for the accuracy and appropriateness of the content. The same standards for ethics, copyright, attributions and permissions as for the article apply. Supplements are not edited by Eurosurveillance and the journal is not responsible for the maintenance of any links or email addresses provided therein.

## List of Supplements

|                                                                                         |           |
|-----------------------------------------------------------------------------------------|-----------|
| <b>SUPPLEMENT I</b> .....                                                               | <b>2</b>  |
| LITERATURE REVIEW STRATEGY.....                                                         | 2         |
| <b>SUPPLEMENT II</b> .....                                                              | <b>3</b>  |
| PROFILE AND CRITERIA OF KEY INFORMANTS INTERVIEWED AS PART OF THE HAI IN HHC STUDY..... | 3         |
| <b>SUPPLEMENT III</b> .....                                                             | <b>4</b>  |
| HAI IN HHC IN-DEPTH INTERVIEW GUIDE.....                                                | 4         |
| <b>SUPPLEMENT IV</b> .....                                                              | <b>6</b>  |
| DELPHI QUESTIONNAIRE: FIRST ROUND.....                                                  | 6         |
| DELPHI QUESTIONNAIRE: SECOND ROUND.....                                                 | 13        |
| <b>SUPPLEMENT V</b> .....                                                               | <b>18</b> |
| RESULTS OF THE LITERATURE REVIEW.....                                                   | 18        |
| <b>SUPPLEMENT VI</b> .....                                                              | <b>28</b> |
| PARTICIPANT’S CHARACTERISTICS OF HAI IN HHC IN-DEPTH INTERVIEWS.....                    | 28        |

# Supplement I

## Literature review strategy

### Search terms

The two following key concepts were used for the search: both in text words (in title: abstract or key words) and subject headings when possible: *healthcare-associated infections* and *home care*. Search terms for the first concept included 'infection': 'sepsis': 'pneumonia': 'nosocomial': 'iatrogenic': 'infectious disease' and 'communicable disease': while for the second concept we used 'home care': 'home healthcare': 'home infusion': 'home based hospital care': 'hospital at home' and 'aftercare' These terms and the subjects headings were used in different combinations using the Boolean operators 'AND' and 'OR' on the selected databases.

Strings researched in each database

### Pubmed

```
("home care"[MeSH Terms] OR "home$care"[ Title/Abstract] OR "home health$care"[Title/Abstract] OR "home infusion"[MeSH Terms] OR "home infusion"[Title/Abstract] OR "after care" [MeSH Terms] OR "after$care"[ Title/Abstract] OR "home based hospital care"[Title/Abstract] OR " hospital at home"[Title/Abstract])) AND (("infection*"[Title/Abstract] OR "sepsis"[ MeSH Terms] OR "sepsis"[Title/Abstract] OR "pneumonia*"[ MeSH Terms] OR "pneumonia*"[Title/Abstract] OR "infectious disease*"[Title/Abstract] OR "communicable disease*"[Title/Abstract] OR "nosocomial" [Title/Abstract] OR "iatrogenic" [Title/Abstract]))
```

### Cochrane

```
("home care"):ti: ab: kw AND infection:ti: ab: kw
```

### ScienceDirect

```
("home care" OR "home health care" OR aftercare) AND (infection OR sepsis OR pneumonia OR "infectious disease" OR nosocomial)
```

### CINAHL

```
("home care" OR "home health care" OR aftercare OR "home infusion" OR "home based hospital care" OR "hospital at home") AND (infection OR sepsis OR pneumonia OR "infectious disease" OR nosocomial OR "communicable disease" OR iatrogenic)
```

### Embase

```
('home healthcare':kw: ab: ti OR 'home infusion':kw: ab: ti OR 'home based hospital care':kw: ab: ti OR 'hospital at home':kw: ab: ti OR 'home care':kw: ab: ti OR 'aftercare':kw: ab: ti) AND (infection*:ab: kw: ti OR sepsis:ab: kw: ti OR pneumonia*:ab: kw: ti OR 'infectious disease*':ab: kw: ti OR 'communicable disease*':ab: kw: ti OR iatrogenic:ab: kw: ti OR nosocomial:ab: kw: ti)
```

### Google scholar

```
allintitle: ("home care" OR "home healthcare" OR "home health care" OR aftercare OR "home infusion" OR "home based hospital care" OR "hospital at home" OR "home care") infection
```

## Supplement II

### Profile and criteria of key informants interviewed as part of the HAI in HHC study

| Function/ job title                                                                                                                                                                                      | Additional requirement/ criteria                                                                                                                                                    |
|----------------------------------------------------------------------------------------------------------------------------------------------------------------------------------------------------------|-------------------------------------------------------------------------------------------------------------------------------------------------------------------------------------|
| 1. <b>Nurse</b> conducting HHC visits                                                                                                                                                                    | <ul style="list-style-type: none"> <li>Working as employee for an organisation specialised in providing HHC (e.g. <i>wit-gele kruis</i>)</li> </ul>                                 |
| 2. <b>Nurse</b> conducting HHC visits                                                                                                                                                                    | <ul style="list-style-type: none"> <li>Working as self-employed nurse</li> </ul>                                                                                                    |
| 3. <b>Physiotherapist</b> conducting HHC visits                                                                                                                                                          |                                                                                                                                                                                     |
| 4. Person providing family/household care ( <i>familiale zorg</i> ) to sick persons at home?                                                                                                             | <ul style="list-style-type: none"> <li>Person should be working as employee for an organisation providing family/household care to sick persons at home</li> </ul>                  |
| 5. <b>General practitioner</b> conducting HHC visits                                                                                                                                                     |                                                                                                                                                                                     |
| 6. <b>Patients</b> representative                                                                                                                                                                        | <ul style="list-style-type: none"> <li>Member of a recognised Belgian patient platform</li> </ul>                                                                                   |
| 7. Healthcare professional involved in a <b>hospitalisation at home pilot projects</b>                                                                                                                   | <ul style="list-style-type: none"> <li>And conducting HHC visits as part of this project</li> <li>This might be a medical doctor, nurse or other healthcare professional</li> </ul> |
| 8. <b>Member of the management</b> of an organisation organising nurse HHC who is responsible for organisation and guiding of the medical aspects of this care                                           | <ul style="list-style-type: none"> <li>Should be someone with a basic medical training (nurse, medical doctor, master in public health,...)</li> </ul>                              |
| 9. <b>Academic healthcare professional (meaning being part of a higher education research group)</b> involved in infection prevention and control                                                        | <ul style="list-style-type: none"> <li>Preferably with experiences regarding infection prevention and control in HHC and/or primary healthcare</li> </ul>                           |
| 10. <b>Public health manager</b> part of a Belgian organisation (e.g. Belgian Superior Health Council) supporting the national/regional health policies and involved in infection prevention and control | <ul style="list-style-type: none"> <li>Preferably with experiences regarding infection prevention and control in HHC and/or primary healthcare</li> </ul>                           |
| 11. <b>Microbiologist</b> involved in infection prevention and control or infectiologist                                                                                                                 |                                                                                                                                                                                     |

# Supplement III

## HAI in HHC in-depth interview guide

### 1. **General background**

(Information on sex: place and function/job are available with the interviewer and should not be asked separately but mentioned in the minutes of the interview)

- How are you involved in advising on and/or organising and/or conducting HHC/infection prevention?
  - And since how long/ since when?

### 2. **How would you describe/define an home care-associated infections?**

- Do you use in your work already a definition for HAI in HCC and if so what is the definition used?
  - Where is this definition coming from?
  - Who/ which organisation/institution developed this definition? (APIC: ECDC: ...)
- What clinical definition would you use? What epidemiological definition would you use?
- What about the fact that the HAI could be originated from a visit of the patient to an healthcare setting outside his/her home (e.g. during visit at general practitioner: during visit at specialist consultation (outpatient department) in hospital)?
  - How to consider this in the definition?
- How to report HAI in HHC?
  - Need for reporting at national level in a standardised way?
  - PPS: surveillance?
  - What to use as denominator (number patients: number device days: device insertions...?)

### 3. **What about specific risk factors for HAIs acquisition in the home care setting?**

- Would you consider these risk factors different than in other settings (e.g. hospital: general practitioner practice)?
  - If so: can you explain this a bit more?
  - What are according to you the biggest differences in risk factor(s) comparing HHC and hospital care?
- What are according to you the most challenging risk factors in HHC?
- What about risk factors in the context of different kind/level of HHC - heterogeneous patient population (e.g. elderly person that needs assistants to get washed and dressed versus patient the is on IV antibiotic treatment through a peripheral catheter)?
- What about different risk factors depending of different home environment (pets: socio-economic background: home hygiene: education level patient and care-givers etc.). 'Home is designed for living and not for healthcare services'
- How to consider/manage these risk factors?
  - Only focus on those with HHC patients with increased/high risks?
  - HHC patients very heterogeneous...one-size-fits-all approach not possible in management of risk factors and infection prevention.
- What is according to you the risk to develop an HAI in HHC? Higher than in healthcare facility (acute/long-term health facility)?

### 4. **What about prevention and control of home care-associated infections in Belgium?**

- How to prevent and control HAI in HHC?
- What is needed to prevent and control HAI in HCC? (training: communication between different healthcare settings – continuum of care: recording and reporting: definitions and priorities at national level: )
- Do you know about guidelines on how to prevent and control HAI in HCC?
  - Who developed these guidelines? Where are these guidelines coming from?
  - Are these guidelines used/implemented in HHC in Belgium? If so: where? By whom?
  - Do you have comments on these guidelines? If so: what kind?
  - Are these guidelines according to you useful for the HHC setting or should there be changes in these guidelines? If so: what kind of changes?
- How would you deal with specific HHC HAI risk factors?
- How would you deal with different kind/level of care provided in HHC (e.g. elderly person that needs assistants to get washed and dressed versus patient the is on IV antibiotic treatment through a peripheral catheter).
- What about different risk factors depending of different home environment (pets: socio-economic background: home hygiene: etc.)? How to manage this?
- Do you know about guidelines and interventions already implemented in Belgium by healthcare workers providing HHC to prevent and control HAI?
  - If so: what by whom and what are the experiences (outcome) with the implementation of these guidelines and interventions?

# Supplement IV

## Delphi questionnaire: first round

### Introduction

*Dear participant:*

*Thank you for taking part in the 'Healthcare-Associated Infections (HAI) in Home Healthcare (HHC)' Delphi survey. The survey is part of a broader project which aims to: formulate a definition of HAI in HHC; identify their specific risk factors; and develop a standardized framework for prevention and control of HAI in HHC in Belgium.*

*We have so far performed a literature review and conducted several in-depth interviews: which were used to design this two-steps Delphi survey. Its aim is to reach a consensus between experts on the main results.*

*In this first round: you will be asked to provide some information about your background and profession: and to answer questions related to five main areas:*

- 1. Definitions of HAI in HHC;*
- 2. Reporting of HAI in HHC*
- 3. Risk factors for HAI in HHC;*
- 4. Measures and guidelines to prevent and control HAI in HHC.*

*In total the survey should take between 25 and 35 minutes. We are eager to learn about your opinions and thank you for your collaboration and your time!  
Please click 'Next' at the bottom of the screen to proceed*

*This project has been initiated and funded by the King Boudouin Foundation and is being carried out by Sciensano: the Belgian Federal Public Health Institute.*

*Participation in this survey is voluntary and completely anonymous.*

---

### Participant's information

In this section: we would like to have more information about your background: relevant to Healthcare-Associated Infections (HAI) in Home Healthcare (HHC).

- 1. How many years of working experience do you have in healthcare?** \_\_\_\_\_
  - 2. Please indicate how much you are involved in the following professional activities:**
    - providing home healthcare
    - Involved in policy making
    - Involved in the management of an organization offering home healthcare services
    - Academic healthcare professional
    - Involved in a hospital at home (eg/OPAT) project
    - Involved in infection prevention and control
    - Public Health management
- Scale: never-often
- 3. If you have experience in home healthcare: please indicate how many years of working experience you have in this field (if no experience: indicate 0)**

---

|                                   |
|-----------------------------------|
| <b>Definitions of HAIs in HHC</b> |
|-----------------------------------|

In this section: we aim to investigate if there is information: need for and agreement on definition of Healthcare-Associated Infections (HAI) in Home Healthcare (HHC).

**4. Do you know a definition of HAI in HHC?**

- Yes
- No

IF Yes: Could you write the definitions you know: or cite the source who defines it?

\_\_\_\_\_

IF No: Go to question 5 directly

**5. Do you agree there should be a standardized definition of HAI in HHC?**

- Yes
- No

IF Yes: Go to question 6 directly

IF No: Could you please motivate your answer?

\_\_\_\_\_

**6. Given the following definitions of HAI in HHC: which we encountered during our literature review and in-depth interviews: could you please say how much you agree with each of them?**

| Nr. | List of Definitions                                                                                                                                                                                                                                                                | Strongly disagree | Disagree | Agree | Strongly agree | I don't know |
|-----|------------------------------------------------------------------------------------------------------------------------------------------------------------------------------------------------------------------------------------------------------------------------------------|-------------------|----------|-------|----------------|--------------|
| 6.1 | Any infection that develops in a patient who is cared for at home                                                                                                                                                                                                                  | ○                 | ○        | ○     | ○              | ○            |
| 6.2 | Any infection that develops in a patient who is cared for at home: and is related to receiving healthcare                                                                                                                                                                          | ○                 | ○        | ○     | ○              | ○            |
| 6.3 | Any infection that is associated with a medical or surgical intervention and that was neither present nor incubating at the time of initiation of care in the patient's home                                                                                                       | ○                 | ○        | ○     | ○              | ○            |
| 6.4 | Any infection that develops in a patient who receives HHC from a professional healthcare worker and that occurs 48 hours or later after initiating this HHC                                                                                                                        | ○                 | ○        | ○     | ○              | ○            |
| 6.5 | Any infection that can be specifically linked with providing care (e.g. wound infection: infection linked with the use of catheters) that develops in a patient who receives HHC from a professional healthcare worker                                                             | ○                 | ○        | ○     | ○              | ○            |
| 6.6 | Any infection that can be specifically linked with providing care (e.g. wound infection: infection linked with the use of catheters) that develops in a patient who receives HHC from a professional healthcare worker and that occurs 48 hours or later after initiating this HHC | ○                 | ○        | ○     | ○              | ○            |

If you would like to suggest another definition of HAI in HHC in Belgium: please do so here (optional): \_\_\_\_\_

### Reporting of HAIs in HHC

In this section: we would like to know your views on the importance of Healthcare-Associated Infections (HAI) in Home Healthcare (HHC): whether this problem requires a reporting and if so: by which method.

#### 7. How much do you agree with the following statements regarding the prevalence of HAI in HHC in Belgium?

| Nr. | <i>Prevalence of HAI in HHC in Belgium is...</i>                                                            | Strongly disagree     | Disagree              | Agree                 | Strongly agree        | I don't know          |
|-----|-------------------------------------------------------------------------------------------------------------|-----------------------|-----------------------|-----------------------|-----------------------|-----------------------|
| 7.1 | Most probably low                                                                                           | <input type="radio"/> | <input type="radio"/> | <input type="radio"/> | <input type="radio"/> | <input type="radio"/> |
| 7.2 | Not known: but lower than in hospitals and in nursing homes                                                 | <input type="radio"/> | <input type="radio"/> | <input type="radio"/> | <input type="radio"/> | <input type="radio"/> |
| 7.3 | Not known: and doesn't need to be measured because at present HAI in HHC is not a priority healthcare issue | <input type="radio"/> | <input type="radio"/> | <input type="radio"/> | <input type="radio"/> | <input type="radio"/> |
| 7.4 | Not known: but needs to be measured (at least once) to know the situation regarding HAI in HHC              | <input type="radio"/> | <input type="radio"/> | <input type="radio"/> | <input type="radio"/> | <input type="radio"/> |
| 7.5 | Underestimated and minimalized because data is lacking                                                      | <input type="radio"/> | <input type="radio"/> | <input type="radio"/> | <input type="radio"/> | <input type="radio"/> |
| 7.6 | Most probably high                                                                                          | <input type="radio"/> | <input type="radio"/> | <input type="radio"/> | <input type="radio"/> | <input type="radio"/> |

If you have another opinion regarding the prevalence of HAI in HHC in Belgium: please state it here (optional):

#### 8. How much do you agree with the following statements regarding the need to report HAI in HHC in Belgium?

| Nr. | <i>Statement</i>                                                                                                                                                                          | Strongly disagree     | Disagree              | Agree                 | Strongly agree        | I don't know          |
|-----|-------------------------------------------------------------------------------------------------------------------------------------------------------------------------------------------|-----------------------|-----------------------|-----------------------|-----------------------|-----------------------|
| 8.1 | Reporting of HAI in HHC is currently not needed since it is not a healthcare priority                                                                                                     | <input type="radio"/> | <input type="radio"/> | <input type="radio"/> | <input type="radio"/> | <input type="radio"/> |
| 8.2 | Reporting of HAI in HHC is needed for all occurring infections                                                                                                                            | <input type="radio"/> | <input type="radio"/> | <input type="radio"/> | <input type="radio"/> | <input type="radio"/> |
| 8.3 | Reporting of HAI in HHC is needed because at present there is no data available which makes it difficult to know its importance; it might be overestimated or underestimated              | <input type="radio"/> | <input type="radio"/> | <input type="radio"/> | <input type="radio"/> | <input type="radio"/> |
| 8.4 | Reporting of HAI in HHC is needed only for those infections that can be specifically linked with providing care (e.g. wound infection: infection linked with the use of catheters) in HHC | <input type="radio"/> | <input type="radio"/> | <input type="radio"/> | <input type="radio"/> | <input type="radio"/> |
| 8.5 | Reporting of HAI in HHC should be based on diagnostic microbiological elements and not only on infections' signs and symptoms                                                             | <input type="radio"/> | <input type="radio"/> | <input type="radio"/> | <input type="radio"/> | <input type="radio"/> |

If you have another opinion regarding the need to report HAI in HHC in Belgium: please state it here (optional) : \_\_\_\_\_

**9. How much do you agree with the following statements regarding ways to report HAI in HHC in Belgium?**

Point Prevalence Survey (PPS): study done on a given population which measures the prevalence (proportion of cases) of a defined problem at a specific point in time.

Surveillance system: continuous: systematic data collection and analysis.

| Nr. | <i>There is need for....</i>                                                                                                                                                         | Strongly disagree     | Disagree              | Agree                 | Strongly agree        | I don't know          |
|-----|--------------------------------------------------------------------------------------------------------------------------------------------------------------------------------------|-----------------------|-----------------------|-----------------------|-----------------------|-----------------------|
| 9.1 | A study to quantify the prevalence of different HAI and obtain information on the importance of the issue                                                                            | <input type="radio"/> | <input type="radio"/> | <input type="radio"/> | <input type="radio"/> | <input type="radio"/> |
| 9.2 | A specific study on MRSA (and other MDRO) prevalence in HHC patients and their caregivers (including nurse: GP: etc.)                                                                | <input type="radio"/> | <input type="radio"/> | <input type="radio"/> | <input type="radio"/> | <input type="radio"/> |
| 9.3 | A point prevalence survey (PPS): organized only once: that includes all HAI occurring in HHC                                                                                         | <input type="radio"/> | <input type="radio"/> | <input type="radio"/> | <input type="radio"/> | <input type="radio"/> |
| 9.4 | A PPS organized only once including only HAI that can be specifically linked with providing care (e.g. wound infection: infection linked with the use of catheters) occurring in HHC | <input type="radio"/> | <input type="radio"/> | <input type="radio"/> | <input type="radio"/> | <input type="radio"/> |
| 9.5 | A PPS that is repeated on regular basis (e.g. every 3 to 5 years)                                                                                                                    | <input type="radio"/> | <input type="radio"/> | <input type="radio"/> | <input type="radio"/> | <input type="radio"/> |
| 9.6 | A surveillance system including all HAI occurring in HHC                                                                                                                             | <input type="radio"/> | <input type="radio"/> | <input type="radio"/> | <input type="radio"/> | <input type="radio"/> |
| 9.7 | A surveillance system including only HAI that can be specifically linked with providing care (e.g. wound infection: infection linked with the use of catheters) occurring in HHC     | <input type="radio"/> | <input type="radio"/> | <input type="radio"/> | <input type="radio"/> | <input type="radio"/> |
| 9.8 | Start with a PPS and depending on the results of the PPS set up a surveillance system for some type of HAI                                                                           | <input type="radio"/> | <input type="radio"/> | <input type="radio"/> | <input type="radio"/> | <input type="radio"/> |

If you would like to suggest another way to report HAI in HHC in Belgium: please do so here (optional): \_\_\_\_\_

**Risk Factors for HAIs in HHC**

In this section: we seek to identify the specific risk factors that contribute to the acquisition of Healthcare-associated infections (HAI) in the home setting: as compared to the hospital setting.

**10. How much do you agree with the following statements regarding risk factors for HAI in HHC?**

| Nr.  | <i>Statement</i>                                                                              | Strongly disagree     | Disagree              | Agree                 | Strongly agree        | I don't know          |
|------|-----------------------------------------------------------------------------------------------|-----------------------|-----------------------|-----------------------|-----------------------|-----------------------|
| 10.1 | Risk factors for HAIs in home care are different than those in hospital care                  | <input type="radio"/> | <input type="radio"/> | <input type="radio"/> | <input type="radio"/> | <input type="radio"/> |
| 10.2 | The risk for HAIs is higher in hospital care than in home care                                | <input type="radio"/> | <input type="radio"/> | <input type="radio"/> | <input type="radio"/> | <input type="radio"/> |
| 10.3 | There is a need for additional research on identification of the risk factors for HAIs in HHC | <input type="radio"/> | <input type="radio"/> | <input type="radio"/> | <input type="radio"/> | <input type="radio"/> |

**11. Given the following risk factors: could you please report what you think is their importance in developing a HAI in HHC?**

| Nr.                                                                           | List of Risk Factors                                                          | Very low              | Low                   | Intermediate          | High                  | Very high             | I don't know          |
|-------------------------------------------------------------------------------|-------------------------------------------------------------------------------|-----------------------|-----------------------|-----------------------|-----------------------|-----------------------|-----------------------|
| <i>Risk factors linked with patient's lifestyle and socio-economic status</i> |                                                                               |                       |                       |                       |                       |                       |                       |
| 11.1                                                                          | Patient's personal hygiene                                                    | <input type="radio"/> | <input type="radio"/> | <input type="radio"/> | <input type="radio"/> | <input type="radio"/> | <input type="radio"/> |
| 11.2                                                                          | Home hygiene                                                                  | <input type="radio"/> | <input type="radio"/> | <input type="radio"/> | <input type="radio"/> | <input type="radio"/> | <input type="radio"/> |
| 11.3                                                                          | Home infrastructure (presence of sanitations: soap...)                        | <input type="radio"/> | <input type="radio"/> | <input type="radio"/> | <input type="radio"/> | <input type="radio"/> | <input type="radio"/> |
| 11.4                                                                          | Presence of pet in the home environment                                       | <input type="radio"/> | <input type="radio"/> | <input type="radio"/> | <input type="radio"/> | <input type="radio"/> | <input type="radio"/> |
| 11.5                                                                          | Education level of the patient                                                | <input type="radio"/> | <input type="radio"/> | <input type="radio"/> | <input type="radio"/> | <input type="radio"/> | <input type="radio"/> |
| 11.6                                                                          | Presence of caregiver(s) in the household                                     | <input type="radio"/> | <input type="radio"/> | <input type="radio"/> | <input type="radio"/> | <input type="radio"/> | <input type="radio"/> |
| 11.7                                                                          | Socio-economic status of the patient                                          | <input type="radio"/> | <input type="radio"/> | <input type="radio"/> | <input type="radio"/> | <input type="radio"/> | <input type="radio"/> |
| 11.8                                                                          | Training of patient and caregiver(s) about the measures to prevent HAI in HHC | <input type="radio"/> | <input type="radio"/> | <input type="radio"/> | <input type="radio"/> | <input type="radio"/> | <input type="radio"/> |
| <i>Risk factors linked with patient's characteristics and pathology</i>       |                                                                               |                       |                       |                       |                       |                       |                       |
| 11.9                                                                          | Patient's age                                                                 | <input type="radio"/> | <input type="radio"/> | <input type="radio"/> | <input type="radio"/> | <input type="radio"/> | <input type="radio"/> |
| 11.11                                                                         | Patient's gender                                                              | <input type="radio"/> | <input type="radio"/> | <input type="radio"/> | <input type="radio"/> | <input type="radio"/> | <input type="radio"/> |
| 11.11                                                                         | Underlying health condition of the patient                                    | <input type="radio"/> | <input type="radio"/> | <input type="radio"/> | <input type="radio"/> | <input type="radio"/> | <input type="radio"/> |
| 11.12                                                                         | Medical condition for which HHC was indicated                                 | <input type="radio"/> | <input type="radio"/> | <input type="radio"/> | <input type="radio"/> | <input type="radio"/> | <input type="radio"/> |
| 11.13                                                                         | Presence of invasive devices                                                  | <input type="radio"/> | <input type="radio"/> | <input type="radio"/> | <input type="radio"/> | <input type="radio"/> | <input type="radio"/> |
| 11.14                                                                         | Duration of the presence of invasive devices                                  | <input type="radio"/> | <input type="radio"/> | <input type="radio"/> | <input type="radio"/> | <input type="radio"/> | <input type="radio"/> |
| 11.15                                                                         | Duration of the home care                                                     | <input type="radio"/> | <input type="radio"/> | <input type="radio"/> | <input type="radio"/> | <input type="radio"/> | <input type="radio"/> |
| <i>Risk factors linked to care</i>                                            |                                                                               |                       |                       |                       |                       |                       |                       |
| 11.16                                                                         | Hand hygiene of healthcare provider                                           | <input type="radio"/> | <input type="radio"/> | <input type="radio"/> | <input type="radio"/> | <input type="radio"/> | <input type="radio"/> |
| 11.17                                                                         | Management of invasive devices by the healthcare provider                     | <input type="radio"/> | <input type="radio"/> | <input type="radio"/> | <input type="radio"/> | <input type="radio"/> | <input type="radio"/> |
| 11.18                                                                         | Frequency of visits by healthcare provider                                    | <input type="radio"/> | <input type="radio"/> | <input type="radio"/> | <input type="radio"/> | <input type="radio"/> | <input type="radio"/> |
| 11.19                                                                         | Lack of time by the healthcare provider during the visit                      | <input type="radio"/> | <input type="radio"/> | <input type="radio"/> | <input type="radio"/> | <input type="radio"/> | <input type="radio"/> |
| 11.20                                                                         | Communication between different care providers                                | <input type="radio"/> | <input type="radio"/> | <input type="radio"/> | <input type="radio"/> | <input type="radio"/> | <input type="radio"/> |

If you would like to suggest other risk factors of HAI in HHC: please do so here (optional):

---

|                                                                   |
|-------------------------------------------------------------------|
| <b>Measures and guidelines to prevent and control HAIs in HHC</b> |
|-------------------------------------------------------------------|

In this section: we seek to investigate which measures would be most appropriate to prevent and control Healthcare-Associated Infections (HAI): as well as the need for specific guidelines in the home setting: as compared to the hospital setting.



If you would like to suggest other measures to prevent and control HAI in HHC in Belgium: please do so here (optional):

---

**13. How much do you agree with the following statements regarding availability and need for guidelines to prevent and control HAI in HHC in Belgium?.**

By guidelines: we mean formalized documentation recommending how something should be done such as guideline for prevention of catheter-associated urinary tract infections.

| Nr.  | Statements                                                                                                                                                                                                                     | Strongly disagree     | Disagree              | Neutral               | Agree                 | Strongly agree        | I don't know          |
|------|--------------------------------------------------------------------------------------------------------------------------------------------------------------------------------------------------------------------------------|-----------------------|-----------------------|-----------------------|-----------------------|-----------------------|-----------------------|
| 13.1 | There are no specific guidelines to prevent and control HAI in HHC for Belgium                                                                                                                                                 | <input type="radio"/> | <input type="radio"/> | <input type="radio"/> | <input type="radio"/> | <input type="radio"/> | <input type="radio"/> |
| 13.2 | Existing guidelines for hospital setting can be adapted and used in the home care setting                                                                                                                                      | <input type="radio"/> | <input type="radio"/> | <input type="radio"/> | <input type="radio"/> | <input type="radio"/> | <input type="radio"/> |
| 13.3 | There is a need for standardized IPC guidelines for HHC but these must leave room and possibilities for adaptation to the local home and HHC context                                                                           | <input type="radio"/> | <input type="radio"/> | <input type="radio"/> | <input type="radio"/> | <input type="radio"/> | <input type="radio"/> |
| 13.4 | There is a need for standardized general guidelines that apply to all patients receiving HHC                                                                                                                                   | <input type="radio"/> | <input type="radio"/> | <input type="radio"/> | <input type="radio"/> | <input type="radio"/> | <input type="radio"/> |
| 13.5 | There is a need for standardized specific guidelines that apply to patients receiving more complex HHC                                                                                                                         | <input type="radio"/> | <input type="radio"/> | <input type="radio"/> | <input type="radio"/> | <input type="radio"/> | <input type="radio"/> |
| 13.6 | It would be an added value if national standardized guidelines on IPC of HAI in HHC would be available and accessible to all the staff involved in delivering HHC                                                              | <input type="radio"/> | <input type="radio"/> | <input type="radio"/> | <input type="radio"/> | <input type="radio"/> | <input type="radio"/> |
| 13.7 | IPC guidelines related to specific technical procedures provided in HHC (e.g. hospital at home: outpatient parenteral antibiotic therapy) should be standardized nationally and not differ according to the referring hospital | <input type="radio"/> | <input type="radio"/> | <input type="radio"/> | <input type="radio"/> | <input type="radio"/> | <input type="radio"/> |
| 13.8 | There is an urgent need for IPC guidelines specific for HHC                                                                                                                                                                    | <input type="radio"/> | <input type="radio"/> | <input type="radio"/> | <input type="radio"/> | <input type="radio"/> | <input type="radio"/> |

If you have another opinion regarding the need and availability of guidelines to prevent and control HAI in HHC in Belgium: please state it here (optional):

---

## Delphi questionnaire: second round

### Introduction

*Dear participant:*

*Thank you for taking part in this second round of the Delphi Survey on 'Healthcare-Associated Infections (HAI) in Home Healthcare (HHC)'. As you know: the survey is part of a broader project which aims to: formulate a definition of HAI in HHC; identify their specific risk factors; and develop a standardized framework for prevention and control of HAI in HHC in Belgium.*

*We have so far performed a literature review: conducted several in-depth interviews and completed the first Delphi round: whose results were used to design this second round. The Delphi method aims to reach a consensus between experts on relevant topics.*

*In this second round: you will find preliminary results of the first round: and will be asked to provide some more information on topics for which there was still ambiguity. We also added a few questions to investigate further some topics or to add input from the comments received during the first round. The four main areas investigated are:*

- 1. Definition of HAI in HHC;*
- 2. Reporting of HAI in HHC*
- 3. Risk factors for HAI in HHC;*
- 4. Measures and guidelines to prevent and control HAI in HHC.*

*In total the survey should take **no more than 15 minutes**. We are eager to learn about your opinions and thank you for your collaboration and your time!  
Please click 'Next' at the bottom of the screen to proceed*

*This project has been initiated and funded by the King Boudouin Foundation and is being carried out by Sciensano: the Belgian Federal Public Health Institute.*

*Participation in this survey is voluntary and completely anonymous.*

### Participant's information

In this section: we would like to have more information about your background: relevant to Healthcare-Associated Infections (HAI) in Home Healthcare (HHC).

|           |                                                                                                                                                               |  |
|-----------|---------------------------------------------------------------------------------------------------------------------------------------------------------------|--|
| <b>Q1</b> | How many years of working experience do you have in <b>healthcare</b> ?                                                                                       |  |
| <b>Q2</b> | If you have experience in <b>home healthcare</b> : please indicate how many years of working experience you have in this field (if no experience: indicate 0) |  |

**Q3.** Please indicate how much you are involved in the following professional activities:

| Nr. |                                                                                 | <b>never</b>          | <b>rarely</b>         | <b>sometimes</b>      | <b>often</b>          |
|-----|---------------------------------------------------------------------------------|-----------------------|-----------------------|-----------------------|-----------------------|
| 3.1 | Providing home healthcare                                                       | <input type="radio"/> | <input type="radio"/> | <input type="radio"/> | <input type="radio"/> |
| 3.2 | Involved in policy making                                                       | <input type="radio"/> | <input type="radio"/> | <input type="radio"/> | <input type="radio"/> |
| 3.3 | Involved in the management of an organization offering home healthcare services | <input type="radio"/> | <input type="radio"/> | <input type="radio"/> | <input type="radio"/> |
| 3.4 | Academic healthcare professional                                                | <input type="radio"/> | <input type="radio"/> | <input type="radio"/> | <input type="radio"/> |
| 3.5 | Involved in a hospital at home (eg/OPAT) project                                | <input type="radio"/> | <input type="radio"/> | <input type="radio"/> | <input type="radio"/> |
| 3.6 | Involved in infection prevention and control (IPC)                              | <input type="radio"/> | <input type="radio"/> | <input type="radio"/> | <input type="radio"/> |
| 3.7 | Public Health management                                                        | <input type="radio"/> | <input type="radio"/> | <input type="radio"/> | <input type="radio"/> |

OPAT: Outpatient parenteral antimicrobial therapy

### Definitions of HAIs in HHC

In the first Delphi round: all respondents agreed there should be a standardized definition of Healthcare-Associated Infections (HAI) in Home Healthcare (HHC).

**Q4.** Among the suggestions made: two statements obtained a level of agreement of more than 85%. Could you please select the statement you most agree with?

| Nr. | Definitions                                                                                                                                                                                                                                                                        | Agree most            | Results round 1: % agreed and strongly agreed |
|-----|------------------------------------------------------------------------------------------------------------------------------------------------------------------------------------------------------------------------------------------------------------------------------------|-----------------------|-----------------------------------------------|
| 4.1 | Any infection that develops in a patient who receives HHC from a professional healthcare worker and that occurs 48 hours or later after initiating this HHC                                                                                                                        | <input type="radio"/> | 86                                            |
| 4.2 | Any infection that can be specifically linked with providing care (e.g. wound infection: infection linked with the use of catheters) that develops in a patient who receives HHC from a professional healthcare worker and that occurs 48 hours or later after initiating this HHC | <input type="radio"/> | 90                                            |

If you have a comment: please state it here (optional):

---

### Reporting of HAIs in HHC

In the first Delphi round: all respondents agreed reporting was needed in order to get an idea of the prevalence of the problem. More than 80% of them believed it was currently underestimated.

**Q5.** Among the suggestions made regarding the **need to report HAI in HHC in Belgium**: two statements did not reach a high level of agreement. Could you please select the statement you most agree with?

| Nr. | Statement                                                                                                                                                                                 | Agree Most            | Results round 1: % agreed and strongly agreed |
|-----|-------------------------------------------------------------------------------------------------------------------------------------------------------------------------------------------|-----------------------|-----------------------------------------------|
| 5.1 | Reporting of HAI in HHC is needed for all occurring infections                                                                                                                            | <input type="radio"/> | 45                                            |
| 5.2 | Reporting of HAI in HHC is needed only for those infections that can be specifically linked with providing care (e.g. wound infection: infection linked with the use of catheters) in HHC | <input type="radio"/> | 75                                            |

If you have a comment: : please state it here (optional):

---

In the first Delphi round: 90% of the respondents agreed to start with a point prevalence survey (PPS) and depending on the PPS result: set up a surveillance system. More than 80% of the respondents also agreed to repeat a PPS on a regular basis (every 3 to 5 years).

**Q6.** Among the suggestions made regarding the **ways to report HAI in HHC in Belgium**: two statements did not reach a high level of agreement. Could you please select the statement you most agree with?

*Point Prevalence Survey (PPS): study done on a given population which measures the prevalence (proportion of cases) of a defined problem at a specific point in time.*

*Surveillance system: continuous: systematic data collection and analysis.*

| Nr. | <i>There is need for....</i>                                                                                                                                     | Agree most            | Results round 1: % agreed and strongly agreed |
|-----|------------------------------------------------------------------------------------------------------------------------------------------------------------------|-----------------------|-----------------------------------------------|
| 6.1 | A point prevalence survey (PPS) that includes all HAI occurring in HHC                                                                                           | <input type="radio"/> | 57                                            |
| 6.2 | A PPS including only HAI that can be specifically linked with providing care (e.g. wound infection: infection linked with the use of catheters) occurring in HHC | <input type="radio"/> | 56                                            |

**Q7.** Among the suggestions made regarding the **ways to report HAI in HHC in Belgium:** some statements did not reach a high level of agreement and needed to be investigated further. We therefore added or rephrased some questions for more clarification. Could you please say how much you agree with each of the following statements?

| Nr. |                                                                                                                                         | Strongly disagree     | Disagree              | Agree                 | Strongly agree        | Results round 1: % agreed and strongly agreed |
|-----|-----------------------------------------------------------------------------------------------------------------------------------------|-----------------------|-----------------------|-----------------------|-----------------------|-----------------------------------------------|
| 7.1 | Reporting of HAI in HHC should be based on diagnostic microbiological elements and not only on infections' signs and symptoms           | <input type="radio"/> | <input type="radio"/> | <input type="radio"/> | <input type="radio"/> | 74                                            |
| 7.2 | There is need for a specific study on MRSA (and other MDRO) prevalence in HHC patients and their caregivers (including nurse: GP: etc.) | <input type="radio"/> | <input type="radio"/> | <input type="radio"/> | <input type="radio"/> | 65                                            |
| 7.3 | Prevalence of MRSA (and other MDRO) in HHC <b>patients and their caregivers</b> should be included in the PPS                           | <input type="radio"/> | <input type="radio"/> | <input type="radio"/> | <input type="radio"/> | NA*                                           |
| 7.4 | Prevalence of MRSA (and other MDRO) in HHC <b>patients only</b> (and not the caregivers) should be included in the PPS                  | <input type="radio"/> | <input type="radio"/> | <input type="radio"/> | <input type="radio"/> | NA*                                           |

\* 'NA': not applicable: as this question was not asked in the first round

If you have a comment: please state it here (optional):

### Risk Factors for HAIs in HHC

In the first Delphi round: all respondents agreed there was a need for additional research on identification of risk factors for HAIs in HHC.

**Q8.** For the following risk factors for HAI in HHC: a level of agreement higher than 80% of the respondents was reached. Could you please select the five risk factors you believe are **most needed to act on** and the five risk factors you believe are **most feasible to act on**?

| Nr.  | List of Risk Factors                                                          | Action most needed    | Action most feasible  | Results round 1: % agreed and strongly agreed |
|------|-------------------------------------------------------------------------------|-----------------------|-----------------------|-----------------------------------------------|
| 8.1  | Patient's personal hygiene                                                    | <input type="radio"/> | <input type="radio"/> | 100                                           |
| 8.2  | Home infrastructure (presence of sanitations: soap...)                        | <input type="radio"/> | <input type="radio"/> | 100                                           |
| 8.3  | Socio-economic status of the patient                                          | <input type="radio"/> | <input type="radio"/> | 84                                            |
| 8.4  | Training of patient and caregiver(s) about the measures to prevent HAI in HHC | <input type="radio"/> | <input type="radio"/> | 95                                            |
| 8.5  | Patient's age                                                                 | <input type="radio"/> | <input type="radio"/> | 81                                            |
| 8.6  | Underlying health condition of the patient                                    | <input type="radio"/> | <input type="radio"/> | 100                                           |
| 8.7  | Medical condition for which HHC was indicated                                 | <input type="radio"/> | <input type="radio"/> | 95                                            |
| 8.8  | Presence of invasive devices                                                  | <input type="radio"/> | <input type="radio"/> | 100                                           |
| 8.9  | Duration of the presence of invasive devices                                  | <input type="radio"/> | <input type="radio"/> | 100                                           |
| 8.10 | Duration of the home care                                                     | <input type="radio"/> | <input type="radio"/> | 81                                            |
| 8.11 | Hand hygiene of healthcare providers                                          | <input type="radio"/> | <input type="radio"/> | 95                                            |
| 8.12 | Management of invasive devices by healthcare providers                        | <input type="radio"/> | <input type="radio"/> | 100                                           |
| 8.13 | Frequency of visits by healthcare providers                                   | <input type="radio"/> | <input type="radio"/> | 90                                            |
| 8.14 | Lack of time by the healthcare providers during the visit                     | <input type="radio"/> | <input type="radio"/> | 80                                            |

If you have a comment: please state it here (optional):

### Measures and guidelines to prevent and control HAIs in HHC

In the first Delphi round: nearly all the statements regarding **measures and guidelines to prevent and control HAI in HHC** in Belgium obtained a level of agreement higher than 80%.

*By measures: we mean plans or actions taken to achieve a particular purpose (protect patients: visitors and staff from acquiring an infection such as appropriate environment hygiene or waste management).*

*By guidelines: we mean formalized documentation recommending how something should be done such as guideline for prevention of catheter-associated urinary tract infections*

**Q9.** Among the suggestions regarding **measures and guidelines to prevent and control HAI in HHC** in Belgium: some statements did not reach a high level of agreement and needed to be investigated further. We therefore added or rephrased some questions for more clarification. Could you please say how much you agree with each of the following statements?

| Nr. | Statements | Strongly disagree | Disagree | Agree | Strongly agree | Results round 1: % agreed and |
|-----|------------|-------------------|----------|-------|----------------|-------------------------------|
|     |            |                   |          |       |                | agreed                        |

|     |                                                                                                                                                                                                                                                    |                       |                       |                       |                       | <b>strongly agreed</b> |
|-----|----------------------------------------------------------------------------------------------------------------------------------------------------------------------------------------------------------------------------------------------------|-----------------------|-----------------------|-----------------------|-----------------------|------------------------|
| 9.1 | Existing national and international accepted infection prevention and control (IPC) guidelines for HAI (e.g. WHO guidelines on hand hygiene) can be used in HHC without adaptation                                                                 | <input type="radio"/> | <input type="radio"/> | <input type="radio"/> | <input type="radio"/> | NA*                    |
| 9.2 | Existing national and international accepted IPC guidelines for HAI (e.g. WHO guidelines on hand hygiene) can be used in HHC but need to be adapted to the home setting when needed                                                                | <input type="radio"/> | <input type="radio"/> | <input type="radio"/> | <input type="radio"/> | NA*                    |
| 9.3 | Existing national and international accepted IPC guidelines for HAI (e.g. WHO guidelines on hand hygiene) cannot be used in HHC: which requires specific guidelines                                                                                | <input type="radio"/> | <input type="radio"/> | <input type="radio"/> | <input type="radio"/> | NA*                    |
| 9.4 | Existing national and international guidelines for specific technical procedures (eg/ hospital guidelines for preventing central line-associated bloodstream infection) can be used in HHC without adaptation                                      | <input type="radio"/> | <input type="radio"/> | <input type="radio"/> | <input type="radio"/> | NA*                    |
| 9.5 | Existing national and international guidelines for specific technical procedures (eg/ hospital guidelines for preventing central line-associated bloodstream infections) can be used in HHC but need to be adapted to the home setting when needed | <input type="radio"/> | <input type="radio"/> | <input type="radio"/> | <input type="radio"/> | NA*                    |
| 9.6 | Existing national and international guidelines for specific technical procedures (eg/ hospital guidelines for preventing central line-associated bloodstream infections) cannot be used in HHC: which requires specific guidelines                 | <input type="radio"/> | <input type="radio"/> | <input type="radio"/> | <input type="radio"/> | NA*                    |

\* 'NA': not applicable: as this question was not asked in the first round

If you have a comment: please state it here (optional):

---

# Supplement V

## Results of the Literature review

| N r | First Author: year | Study information |                            |              |                |                                                                                                                                    | Type of HAI       | Contents - Findings                                                                                                                                                                                                                                                                                                                              |                                                                                                                                                                                                                                                          |                                                                                                                                                                                                                                                                                                    |
|-----|--------------------|-------------------|----------------------------|--------------|----------------|------------------------------------------------------------------------------------------------------------------------------------|-------------------|--------------------------------------------------------------------------------------------------------------------------------------------------------------------------------------------------------------------------------------------------------------------------------------------------------------------------------------------------|----------------------------------------------------------------------------------------------------------------------------------------------------------------------------------------------------------------------------------------------------------|----------------------------------------------------------------------------------------------------------------------------------------------------------------------------------------------------------------------------------------------------------------------------------------------------|
|     |                    |                   | Study type                 | Setting      | Population     | Aims                                                                                                                               |                   | Definitions of HAI in HHC                                                                                                                                                                                                                                                                                                                        | Risk factors of HAI in HHC                                                                                                                                                                                                                               | Recommendations for prevention and control                                                                                                                                                                                                                                                         |
| 1   | Al Wakeel: 2018    | Comment           | Retrospective analysis     | Saudi Arabia | >16 years      | Complications and outcomes in PD in home                                                                                           | Peritonitis ESI   | no info                                                                                                                                                                                                                                                                                                                                          | Assisted peritoneal dialysis was comparable with self care peritoneal dialysis                                                                                                                                                                           | Implementation of protocols can reduce the risks of infections and other dialysis-related complications                                                                                                                                                                                            |
|     |                    | Score             | ++                         | +            | +++            |                                                                                                                                    | +++               | -                                                                                                                                                                                                                                                                                                                                                | +++                                                                                                                                                                                                                                                      | ++                                                                                                                                                                                                                                                                                                 |
| 2   | Barr: 2013         | Comment           | Expert overview            | UK           | no info        | To outline good practice recommendations and highlight OPAT management of infections                                               | device related    | no info                                                                                                                                                                                                                                                                                                                                          | - indwelling intravascular access devices<br>- HAI rates are lower than in hospital                                                                                                                                                                      | To record OPAT adverse outcomes for quality assurance purposes                                                                                                                                                                                                                                     |
|     |                    | Score             | +                          | ++           | -              |                                                                                                                                    | +++               | +++                                                                                                                                                                                                                                                                                                                                              | ++                                                                                                                                                                                                                                                       | ++                                                                                                                                                                                                                                                                                                 |
| 3   | Bech: 2016         | Comment           | Observational cohort       | Denmark      | all age groups | To investigate whether environment risk factors influence the time of 1st CRBSI                                                    | CRBSI             | CRBSI was defined as no other infection sites and a positive blood culture both peripherally and from the catheter                                                                                                                                                                                                                               | - PICC increased risk when compared with Hickman catheter<br>- Hickman catheter had increased risk if managed by a nurse                                                                                                                                 | - Revision of the current allocation guidelines<br>- PICCs should be used only for short-term HPN therapy and when few infusion days per week are needed<br>- Management of the Hickman catheters by home care nurses should be further specialized                                                |
|     |                    | Score             | ++                         | ++           | +++            |                                                                                                                                    | +++               | +++                                                                                                                                                                                                                                                                                                                                              | +++                                                                                                                                                                                                                                                      | ++++                                                                                                                                                                                                                                                                                               |
| 4   | Blais: 2013        | Comment           | Retrospective cohort study | Canada       | all age groups | To document the incidence rate and types of adverse events (AEs) among HC clients and identify factors contributing to these AE    | Infection/ sepsis | Patients who acquired an infection during their period of home care                                                                                                                                                                                                                                                                              | - Acquiring an infection/sepsis was associated with the presence of an AE                                                                                                                                                                                | - Homes are not designed healthcare and are not regulated environments<br>- Consider role of unpaid caregivers when planning strategies to improve HC safely                                                                                                                                       |
|     |                    | Score             | ++                         | +            | +++            |                                                                                                                                    | ++                | -                                                                                                                                                                                                                                                                                                                                                | +                                                                                                                                                                                                                                                        | +++                                                                                                                                                                                                                                                                                                |
| 5   | Buchman: 2013      | Comment           | Retrospective chart review | USA          | all age groups | To determine CRBSI risk factors in HPN                                                                                             | CRBSI             | Clinical symptoms consistent with systemic infection while infusing PN; fatigue; weight loss; the absence or presence of blood leukocytosis: together with positive blood cultures obtained via the CVC and peripherally and from the catheter tip (when the catheter required removal); and the absence of other potential sources of infection | - Being adult compare to being child<br>- Lipid infusion (in adults)<br>- Blood drawing from the CVC<br>- Frequency of infusions (children)<br>- Catheter type (infusion ports>tunneled catheter)<br>- Number of lumens (1<2<3)<br>- Non-PN catheter use | Patients in long-term PN should have single-lumen: tunneled catheter which is used exclusively for PN infusion. Blood samples should not be obtained from the PN catheters: and number of non-PN infusions should be limited. Consider decreasing the lipid emulsion infusion: at least in adults. |
|     |                    | Score             | ++                         | +            | +++            |                                                                                                                                    | +++               | +++                                                                                                                                                                                                                                                                                                                                              | +++                                                                                                                                                                                                                                                      | +++                                                                                                                                                                                                                                                                                                |
| 6   | Chenoweth: 2007    | Comment           | Retrospective cohort study | USA          | all age groups | To identify demographic characteristics of patients: risk factors and outcomes associated with the development of VAP in home care | VAP               | Infection in patients who received home mechanical ventilation and were followed up by respiratory therapists                                                                                                                                                                                                                                    | - Longer duration of the ventilation                                                                                                                                                                                                                     | Interventions may be directed at the education and support of caregivers and focused toward those patients requiring longer daily periods of ventilation.                                                                                                                                          |
|     |                    | Score             | ++                         | +            | +++            |                                                                                                                                    | +++               | ++                                                                                                                                                                                                                                                                                                                                               | +++                                                                                                                                                                                                                                                      | +++                                                                                                                                                                                                                                                                                                |
| 7   | Cheung: 2008       | Comment           | RCT                        | Hong-Kong    | >18 years      | To compare the risk of acquiring UTIs through the conventional practice of using                                                   | UTI               | no info                                                                                                                                                                                                                                                                                                                                          | no info                                                                                                                                                                                                                                                  | Using sterile water to clean the periurethral area before catheterization among home care                                                                                                                                                                                                          |

|    |                 |         |                            |        |                |                                                                                                                                                 |                |                                                                                                                                                                                                                                                                                                                                                                                                                                                                                                                                                                                                                                                                                                                                                                                                                                                                                                                                                                                                                                             |                                                                                                                                             |                                                                                                                                                                       |
|----|-----------------|---------|----------------------------|--------|----------------|-------------------------------------------------------------------------------------------------------------------------------------------------|----------------|---------------------------------------------------------------------------------------------------------------------------------------------------------------------------------------------------------------------------------------------------------------------------------------------------------------------------------------------------------------------------------------------------------------------------------------------------------------------------------------------------------------------------------------------------------------------------------------------------------------------------------------------------------------------------------------------------------------------------------------------------------------------------------------------------------------------------------------------------------------------------------------------------------------------------------------------------------------------------------------------------------------------------------------------|---------------------------------------------------------------------------------------------------------------------------------------------|-----------------------------------------------------------------------------------------------------------------------------------------------------------------------|
|    |                 |         |                            |        |                | 0.05% chlorhexidine gluconate (CHG) versus sterile water for periurethral cleansing before insertion of a urinary catheter                      |                |                                                                                                                                                                                                                                                                                                                                                                                                                                                                                                                                                                                                                                                                                                                                                                                                                                                                                                                                                                                                                                             |                                                                                                                                             | patients will not increase the risk for urinary tract infections                                                                                                      |
|    |                 | Score   | +++                        | +      | +++            |                                                                                                                                                 | +++            | -                                                                                                                                                                                                                                                                                                                                                                                                                                                                                                                                                                                                                                                                                                                                                                                                                                                                                                                                                                                                                                           | -                                                                                                                                           | +++                                                                                                                                                                   |
| 8  | Cornillon: 2017 | Comment | Prospective survey         | France | all age groups | To report on the systematic use of PICC for outpatient care after an allogeneic HSCT                                                            | CRBSI          | The presence of the same organism grow from at least 1 percutaneous blood culture and from a culture of the catheter tip: or that 2 blood samples be drawn (one from a catheter hub and the other from a peripheral vein) that: when cultured: meet CRBSI criteria for quantitative blood cultures or differential time to positivity                                                                                                                                                                                                                                                                                                                                                                                                                                                                                                                                                                                                                                                                                                       | no info                                                                                                                                     | The systematic use of the PICC in a population of outpatients returning home after an allogeneic HSCT seems feasible and safe: regarding the low rate of complication |
|    |                 | Score   | ++                         | ++     | +++            |                                                                                                                                                 | +++            | ++                                                                                                                                                                                                                                                                                                                                                                                                                                                                                                                                                                                                                                                                                                                                                                                                                                                                                                                                                                                                                                          | -                                                                                                                                           | ++                                                                                                                                                                    |
| 9  | Cox.: 207       | Comment | Retrospective cohort study | USA    | all age groups | To determine whether older adults were able to successfully administer home IV antimicrobials without intensive support from home care agencies | device related | no info                                                                                                                                                                                                                                                                                                                                                                                                                                                                                                                                                                                                                                                                                                                                                                                                                                                                                                                                                                                                                                     | Only 3/231 BSI occurred and no specific risks was identified. The numbers are low because patients were not in PN and not immunosuppressed. | The assessment of the patient's and the caregiver's abilities to perform home infusion is crucial to the success of any home infusion program                         |
|    |                 | Score   | ++                         | +      | +++            |                                                                                                                                                 | +++            | -                                                                                                                                                                                                                                                                                                                                                                                                                                                                                                                                                                                                                                                                                                                                                                                                                                                                                                                                                                                                                                           | +++                                                                                                                                         | +++                                                                                                                                                                   |
| 10 | Doran: 2014     | Comment | Delphi survey              | Canada | all age groups | To assess which client events should be considered reportable and preventable in home care                                                      | different HAI  | A new infection related to an IV: PICC: central catheter site or related blood stream                                                                                                                                                                                                                                                                                                                                                                                                                                                                                                                                                                                                                                                                                                                                                                                                                                                                                                                                                       | no info                                                                                                                                     | 90% of experts agreed that HAI should be reportable; meaning making the event known to a higher authority                                                             |
|    |                 | Score   | +                          | +      | +++            |                                                                                                                                                 | +++            | +++                                                                                                                                                                                                                                                                                                                                                                                                                                                                                                                                                                                                                                                                                                                                                                                                                                                                                                                                                                                                                                         | -                                                                                                                                           | +++                                                                                                                                                                   |
| 11 | Doran: 2013     | Comment | Retrospective cohort study | Canada | all age groups | To investigate a significant safety dimension of HC: the occurrence of adverse events and their related outcomes                                | different HAI  | <b>Surgical wound infection:</b> infection present on any ED visit or hospital admission within 30 days of a hospital discharge with open surgery but without infection recorded<br><b>Ventilator-associated pneumonia:</b> pneumonia present on any ED visit or hospital admission within 30 days of RAI-HC assessment among clients who had ventilator documented but didn't have pneumonia recorded at the time of assessment<br><b>Catheter-associated UTI:</b> UTI present on any ED visit or hospital admission within 30 days of RAI-HC assessment among clients who had indwelling urinary catheter documented but didn't have UTI recorded at the time of assessment<br><b>Peripheral IV infection:</b> bacteremia or localized skin infection present on any ED visit or hospital admission within 60 days of RAI-HC assessment among clients who had peripheral IV infusion documented at the time of assessment<br><b>Central line IV infection:</b> Bacteremia or localized skin infection present on any ED visit or hospital | no info                                                                                                                                     | no info                                                                                                                                                               |

|        |                |         |                                   |         |                |                                                                                 |                                 |                                                                                                                                                                                                                                                                                                                                                                                                                                                                                                                                                                                                                                                                                    |                                                                                                                                                                                                                           |                                                                                                                                                                                                                                                                                                                        |
|--------|----------------|---------|-----------------------------------|---------|----------------|---------------------------------------------------------------------------------|---------------------------------|------------------------------------------------------------------------------------------------------------------------------------------------------------------------------------------------------------------------------------------------------------------------------------------------------------------------------------------------------------------------------------------------------------------------------------------------------------------------------------------------------------------------------------------------------------------------------------------------------------------------------------------------------------------------------------|---------------------------------------------------------------------------------------------------------------------------------------------------------------------------------------------------------------------------|------------------------------------------------------------------------------------------------------------------------------------------------------------------------------------------------------------------------------------------------------------------------------------------------------------------------|
|        |                |         |                                   |         |                |                                                                                 |                                 | admission within 60 days of RAI-HC assessment among clients who had central IV infusion documented at the time of assessment                                                                                                                                                                                                                                                                                                                                                                                                                                                                                                                                                       |                                                                                                                                                                                                                           |                                                                                                                                                                                                                                                                                                                        |
|        |                | Score   | ++                                | +       | +++            |                                                                                 | +++                             | +++                                                                                                                                                                                                                                                                                                                                                                                                                                                                                                                                                                                                                                                                                | -                                                                                                                                                                                                                         | -                                                                                                                                                                                                                                                                                                                      |
| 1<br>2 | Embry: 2000    | Comment | Draft definitons for surveillance | USA     | NA             | Draft definitons for surveillance                                               | different HAI                   | <b>Home health-associated infections</b> refer to infections that develop in patients who are receiving home health care and that were neither present nor incubating at the time the patient began receiving home health care (generally: 48-72 hours after admission but may vary based on the incubation time of the infecting pathogen).<br><b>For specific definitions refer to the full text</b>                                                                                                                                                                                                                                                                             | NA                                                                                                                                                                                                                        | NA                                                                                                                                                                                                                                                                                                                     |
|        |                | Score   | ++++                              | +       | -              |                                                                                 | +++                             | +++                                                                                                                                                                                                                                                                                                                                                                                                                                                                                                                                                                                                                                                                                | -                                                                                                                                                                                                                         | -                                                                                                                                                                                                                                                                                                                      |
| 1<br>3 | Friedman: 2000 | Comment | Expert essay                      | USA     | NA             | Overview of infections control in home care                                     | no info                         | no info: refers to some old CDC guideline (1988)                                                                                                                                                                                                                                                                                                                                                                                                                                                                                                                                                                                                                                   | Nurse's bag<br>Devices (noncritical: semicritical: critical)                                                                                                                                                              | It is imperative that home care organizations begin to collect data on HAI in an organized fashion and share their results through meetings and publications                                                                                                                                                           |
|        |                | Score   | +                                 | +       | -              |                                                                                 | -                               |                                                                                                                                                                                                                                                                                                                                                                                                                                                                                                                                                                                                                                                                                    |                                                                                                                                                                                                                           | ++                                                                                                                                                                                                                                                                                                                     |
| 1<br>4 | Gallone: 2016  | Comment | Survey                            | Italy   | all age groups | To assess HAI prevalence                                                        | different HAI                   | no info                                                                                                                                                                                                                                                                                                                                                                                                                                                                                                                                                                                                                                                                            | bed sores: urinary catheter:<br>gastrostomy: tracheostomy:<br>vascular ulcers: diabetic ulcers:<br>mechanical ventilation:<br>ureterostomy: vascular catheter: and ileostomy                                              | Need for a new framework of health system to strictly monitor the phenomenon of HAI in all settings (hospital: nursing home: long-term care facilities: and home care) through an integrated approach: because patients often move from one assistance setting to another: and microorganisms come next after patients |
|        |                | Score   | ++                                | ++      | +++            |                                                                                 | +++                             | -                                                                                                                                                                                                                                                                                                                                                                                                                                                                                                                                                                                                                                                                                  | ++                                                                                                                                                                                                                        | +++                                                                                                                                                                                                                                                                                                                    |
| 1<br>5 | Gorski: 2004   | Comment | Survey                            | USA     | all age groups | To investigate the outcomes of central venous access devices (CVAD) in homecare | CVAD                            | CVAD infection if following criteria are met in >48 from admission or after insertion of CVAD:<br>• Must have a CVAD present and the finding (by blood culture) of bacteremia <b>OR</b><br>• CVAD present and two of the following:<br>- Temperature 2° F or ° 1 C over the patient's baseline or chills<br>- Significant local pain and redness associated with the central catheter or exit site<br>- Hypotension ( 90 mm Hg systolic)<br>- MD suspects central line infection is present and initiates therapy (changes/removes line or starts antibiotics)<br>- WBC count 10: 000 <b>OR</b><br>• Pus: cellulitus: or significant pain present at exit site of central catheter | Multi-lumen catheter:<br>Receiving TPN: Neutropenia:<br>Immunosuppressive drugs:<br>Prior history of CVAD infection:<br>Poor nutrition: Impaired skin integrity: Technique failure:<br>Showering and getting dressing wet | To reduce complications rate:<br>- Identify patients at higher risk of HAI<br>- Involve staff in data collection<br>- Monitor and educate patients<br>- Develop preventive protocols for patients at risk                                                                                                              |
|        |                | Score   | ++                                | +       | +++            |                                                                                 | +++                             | +                                                                                                                                                                                                                                                                                                                                                                                                                                                                                                                                                                                                                                                                                  | +++                                                                                                                                                                                                                       | +++                                                                                                                                                                                                                                                                                                                    |
| 1<br>6 | Von Baum: 2010 | Comment | Environmental study               | Germany | all age groups | To assess whether tap water from the domestic environment                       | different waterborne infections | no info                                                                                                                                                                                                                                                                                                                                                                                                                                                                                                                                                                                                                                                                            | no info                                                                                                                                                                                                                   | Although the risk of infection from household water-borne pathogens appears low: preventive measures                                                                                                                                                                                                                   |

|    |                  |         |                        |       |                |                                                                                                                                                                                                          |                 |                        |                                                                                                                                                                                                                                                                                                                                                                                                                                                                                                                                                                                                                                                                          |                                                                                                                                                                                                                                                                                                                                                                                                                                                                                                                                    |
|----|------------------|---------|------------------------|-------|----------------|----------------------------------------------------------------------------------------------------------------------------------------------------------------------------------------------------------|-----------------|------------------------|--------------------------------------------------------------------------------------------------------------------------------------------------------------------------------------------------------------------------------------------------------------------------------------------------------------------------------------------------------------------------------------------------------------------------------------------------------------------------------------------------------------------------------------------------------------------------------------------------------------------------------------------------------------------------|------------------------------------------------------------------------------------------------------------------------------------------------------------------------------------------------------------------------------------------------------------------------------------------------------------------------------------------------------------------------------------------------------------------------------------------------------------------------------------------------------------------------------------|
|    |                  |         |                        |       |                | of neutropenic patients poses a risk for infections from the waterborne pathogens                                                                                                                        |                 |                        |                                                                                                                                                                                                                                                                                                                                                                                                                                                                                                                                                                                                                                                                          | may be considered on an individual basis in patients with long-term immunosuppression as well as in patients with long-term central-vascular catheterization                                                                                                                                                                                                                                                                                                                                                                       |
|    |                  | Score   | +++                    | ++    | +++            |                                                                                                                                                                                                          |                 | -                      | -                                                                                                                                                                                                                                                                                                                                                                                                                                                                                                                                                                                                                                                                        | +                                                                                                                                                                                                                                                                                                                                                                                                                                                                                                                                  |
| 17 | Gorski: 2010     | Comment | Expert essay           | USA   | NA             | Review of the etiology: identification: and best practices related to central vascular access devices (CVAD)                                                                                             | CVAD            | no info                | Potential source of infection:<br>- Infusate<br>- Skin<br>- Microbial contamination at the catheter hub or needleless connector                                                                                                                                                                                                                                                                                                                                                                                                                                                                                                                                          | Nurses must:<br>- know the infection transmissions<br>- apply infection prevention interventions (hand hygiene: aseptic techniques: and infusion administration)<br>- educate patients on risks and signs of infection<br>- investigate any occurrence of infection to prevent it from happening again.                                                                                                                                                                                                                            |
|    |                  | Score   | +                      | +     | -              |                                                                                                                                                                                                          | +++             | -                      | ++                                                                                                                                                                                                                                                                                                                                                                                                                                                                                                                                                                                                                                                                       | +++                                                                                                                                                                                                                                                                                                                                                                                                                                                                                                                                |
| 18 | McGoldrick: 2010 | Comment | Expert essay           | USA   | NA             | Evidenced- based guidelines and recommendations on methods for managing respiratory equipment used by patients in the home setting and surveillance activities to prevent respiratory infections         | Respiratory HAI | no info                | Risk/Protective factors:<br>- Hand hygiene<br>- Respiratory equipment (noncritical: semicritical: critical)<br>- Oral care<br>- Equipment cleaning<br>- Patients education                                                                                                                                                                                                                                                                                                                                                                                                                                                                                               | Implement evidence-based practices: by organization's staff: patients and caregivers. Combine use hand hygiene: barrier precautions: and meticulous cleaning and disinfection with an EPA registered products.                                                                                                                                                                                                                                                                                                                     |
|    |                  | Score   | +                      | +     | -              |                                                                                                                                                                                                          | +++             | -                      | ++                                                                                                                                                                                                                                                                                                                                                                                                                                                                                                                                                                                                                                                                       |                                                                                                                                                                                                                                                                                                                                                                                                                                                                                                                                    |
| 19 | Horcajada: 2007  | Comment | Retrospective analysis | Spain | all age groups | To review the experience of home care service from 1995 to 2002 using prospectively recorded data                                                                                                        | CRBSI           | Sepsis of the catheter | Self administration of the parenteral treatment                                                                                                                                                                                                                                                                                                                                                                                                                                                                                                                                                                                                                          | Patients that selfadminister the treatments should be selected and trained appropriately: insisting on the hygiene measures and on how to handle the venous catheter.                                                                                                                                                                                                                                                                                                                                                              |
|    |                  | Score   | ++                     | ++    | +++            |                                                                                                                                                                                                          | +++             | -                      | +++                                                                                                                                                                                                                                                                                                                                                                                                                                                                                                                                                                                                                                                                      | +++                                                                                                                                                                                                                                                                                                                                                                                                                                                                                                                                |
| 20 | Shang: 2014      | Comment | Systematic review      | USA   | all age groups | To critically review and synthesize published evidence on infection prevalence and risk factors among adult patients who received HHC services and to evaluate the methodologic quality of these studies | different HAI   | no info                | <b>IV catheter:</b><br>- <u>patients characteristic or medical history</u> (younger age: underlying disease: bone marrow trasplant: receiving TPN treatment: infusion therapy outside home: HPN<5 years: family memebr with HPN)<br>- <u>catheter related factors</u> (multilumen catheter: central venous access salvage)<br>- <u>patient's social or economic factors</u> (being part time student: recipient of social welfare)<br><b>Catheter related UTI:</b><br>being a woman: catheter change interval <4 weeks: number of nurses change catheters<br><b>Ventilator associated pneumonia:</b><br>daily duration of ventilation<br><b>Non-specific infections:</b> | - Identify HHC patients who are at high risk for infection<br>- Give special attention to patients receiving PN because they experience the higher rates of infections<br>- 1-size-fits-all approach is not appropriate in infection control for HHC settings<br>- Assess home environment during 1st home visit<br>- Tailored educatin for the patient and caregivers<br>- Facilitate efficient and effective communication between the different actors in the transition between home care: hospitals and long term facilities. |

|        |                    |         |                             |        |                |                                                                                                                                                         |                                                                                       |                                                                                                                                                                                                                                                           |                                                                                                                                                                                                                                                                                                                                                                                                                                                                                        |                                                                                                                                                                                                                                                                                |
|--------|--------------------|---------|-----------------------------|--------|----------------|---------------------------------------------------------------------------------------------------------------------------------------------------------|---------------------------------------------------------------------------------------|-----------------------------------------------------------------------------------------------------------------------------------------------------------------------------------------------------------------------------------------------------------|----------------------------------------------------------------------------------------------------------------------------------------------------------------------------------------------------------------------------------------------------------------------------------------------------------------------------------------------------------------------------------------------------------------------------------------------------------------------------------------|--------------------------------------------------------------------------------------------------------------------------------------------------------------------------------------------------------------------------------------------------------------------------------|
|        |                    |         |                             |        |                |                                                                                                                                                         |                                                                                       |                                                                                                                                                                                                                                                           | indwelling devices: service offered by agency which offers paid sick leave to the staff                                                                                                                                                                                                                                                                                                                                                                                                |                                                                                                                                                                                                                                                                                |
|        |                    | Score   | +++                         | +      | +++            |                                                                                                                                                         | +++                                                                                   | -                                                                                                                                                                                                                                                         | +++                                                                                                                                                                                                                                                                                                                                                                                                                                                                                    | +++                                                                                                                                                                                                                                                                            |
| 2<br>1 | Schildmeijer: 2018 | Comment | Retrospective record review | Sweden | >18 years      | To explore the origin: incidence: types and preventability of the AEs that occur in patients receiving home healthcare                                  | different HAI                                                                         | Deficniton was given for AE: The AE occurred during the index admission: that is: within 90 days after admission in home healthcare: regardless of caregiver. I think the HAI in HHC was defined as the HAI in hospital but there is no clear definition. | no info                                                                                                                                                                                                                                                                                                                                                                                                                                                                                | The study found that 64% of HAI were preventable: meaning that they could have been prevented if adequate measures and/ or actions had been taken during the patient's contact with healthcare. This definition is based on the terminology in the Swedish Patient Safety Act. |
|        |                    | Score   | ++                          | ++     | +++            |                                                                                                                                                         | +++                                                                                   | +                                                                                                                                                                                                                                                         | -                                                                                                                                                                                                                                                                                                                                                                                                                                                                                      | +                                                                                                                                                                                                                                                                              |
| 2<br>2 | Keller: 2018       | Comment | Expert overview             | USA    | NA             | Needs and requirements for reporting CLABSIs in home infusion therapy                                                                                   | CLABSI                                                                                | Mentions the APIC definition as the reference: but argues that a denominator definition is missing and therefore the measurement is not possible for benchmarking                                                                                         | no info                                                                                                                                                                                                                                                                                                                                                                                                                                                                                | Reports that the 21st Century Cures Act in the US will expand Medicare coverage for home infusion therapy services by 2021 and that this act will likely lead to increased pressure for home infusion therapy CLABSI surveillance                                              |
|        |                    | Score   | +                           | +      |                |                                                                                                                                                         | +++                                                                                   | +                                                                                                                                                                                                                                                         | -                                                                                                                                                                                                                                                                                                                                                                                                                                                                                      | +                                                                                                                                                                                                                                                                              |
| 2<br>3 | Manangan: 2002     | Comment | Expert overview             | USA    | NA             | Feasibility of National surveillance of HAIs in home care setting                                                                                       | NA                                                                                    | Agrees with APIC definitions draft (Embry 2000)                                                                                                                                                                                                           | no info                                                                                                                                                                                                                                                                                                                                                                                                                                                                                | Lists the challenges in having the surveillance system and its usefulness in understanding the epidemiology of HAI in HHC and provide mean for M&E of interventions                                                                                                            |
|        |                    | Score   | +                           | +      |                |                                                                                                                                                         |                                                                                       | +                                                                                                                                                                                                                                                         | -                                                                                                                                                                                                                                                                                                                                                                                                                                                                                      | +                                                                                                                                                                                                                                                                              |
| 2<br>4 | Masotti: 2010      | Comment | Scoping review              | Canada | all age groups | To map the extent and range of existing research on the AE of home care. Six topics: definitions: rates: causes: consequences: interventions and policy | CLABSI<br>CAUTI<br>Ventilator associated infections<br>Wound infections (also others) | Definition of AE: events or occurrences which become apparent during the delivery of home home care services: and which have a negative impact on patient care: patient outcomes: family or support care and resources utilization                        | <b>Patient-level characteristics:</b> increased age and co-morbidities: gender: depression: cognitive impairments: functional status/limitations: patient compliance and living alone or no caregiver<br><b>Organization and system-level characteristics:</b> communication: coordination: collaboration : team experience: training or knowledge: team workload: medication errors: unrecognized polypharmacy: drug label instructions: and inadequate patient monitoring/assessment | - Have more research for home care AE<br>- The rates are most probably underestimated: consider higher<br>- Policies that aim at preventing or reducing the impact of adverse events will need to target multilevel changes                                                    |
|        |                    | Score   | +++                         | +      | +++            |                                                                                                                                                         |                                                                                       | ++                                                                                                                                                                                                                                                        | +++                                                                                                                                                                                                                                                                                                                                                                                                                                                                                    | +++                                                                                                                                                                                                                                                                            |
| 2<br>5 | McGoldrick: 2007   | Comment | Expert essay                | USA    | NA             | To discuss Guideline's recommendations implementation on the management of MDRO in home setting                                                         | NA                                                                                    | no info                                                                                                                                                                                                                                                   | no info                                                                                                                                                                                                                                                                                                                                                                                                                                                                                | - Administrative measures (ICP: annual review)<br>- staff education and training<br>- Surveillance system (M&E)<br>- Prevention and control (hand hygiene: SOPs: contact precautions: equipemnt and supplies: environment)                                                     |
|        |                    | Score   | +                           | +      | -              |                                                                                                                                                         |                                                                                       | -                                                                                                                                                                                                                                                         | -                                                                                                                                                                                                                                                                                                                                                                                                                                                                                      | ++                                                                                                                                                                                                                                                                             |

|    |                |         |                        |        |                |                                                                                                                                                                                   |               |                                                                                                                                                                                                                                                                                                                                           |                                                                                                                                 |                                                                                                                                                                                                                                                                                                                                                                                                                                                                                                                                                                                                                                                                                                                                     |
|----|----------------|---------|------------------------|--------|----------------|-----------------------------------------------------------------------------------------------------------------------------------------------------------------------------------|---------------|-------------------------------------------------------------------------------------------------------------------------------------------------------------------------------------------------------------------------------------------------------------------------------------------------------------------------------------------|---------------------------------------------------------------------------------------------------------------------------------|-------------------------------------------------------------------------------------------------------------------------------------------------------------------------------------------------------------------------------------------------------------------------------------------------------------------------------------------------------------------------------------------------------------------------------------------------------------------------------------------------------------------------------------------------------------------------------------------------------------------------------------------------------------------------------------------------------------------------------------|
| 26 | Miliani: 2015  | Comment | Point prevalence study | France | all age groups | To describe the major characteristics of HAIs and antibiotic consumption in HBHC and to identify risk factors associated with HBHC-associated infections                          | different HAI | HBHC-associated infections were those occurring in a patient during the process of care: neither present nor incubating at the time of starting home care (Day 1): for which the signs and symptoms became apparent after Day 2 and were not associated with a previous discharge from an HCF. (HAI defined using ECDC's case definition) | - Urinary catheter<br>- At least one vascular catheter<br>- A McCabe score 1 or 2                                               | - Start understanding the epidemiology of HAIs in HHC<br>- Programme surveillance initiatives<br>- Train ICP and general HC staff<br>- Raise awareness<br>- Empower patients                                                                                                                                                                                                                                                                                                                                                                                                                                                                                                                                                        |
|    |                | Score   | +++                    | ++     | +++            |                                                                                                                                                                                   | +++           | +++                                                                                                                                                                                                                                                                                                                                       | +++                                                                                                                             | +++                                                                                                                                                                                                                                                                                                                                                                                                                                                                                                                                                                                                                                                                                                                                 |
| 27 | Morrison: 2004 | Comment | Expert essay           | Canada | NA             | To develop a model upon which the resources required to support an effective: integrated infection prevention and control program across the health care continuum could be based | NA            | no info                                                                                                                                                                                                                                                                                                                                   | no info                                                                                                                         | Critical infection prevention and control in home care:<br>- Coordination of care as patients move from institutional to other health care sectors.<br>- Communication: including a centralized database and information system.<br>- Systematic surveillance of infectious diseases using surveillance standards. (Need to develop data collection and program evaluation tools.)<br>- Community consultation.<br>- Outbreak management.<br>- Infection prevention and control education of formal and informal (i.e.: family members) caregivers: including development of resource material. Orientation and continuing education of staff.<br>- Marketing of basic infection prevention and control measures e.g.: handwashing. |
|    |                | Score   | +                      | +      | -              |                                                                                                                                                                                   |               | -                                                                                                                                                                                                                                                                                                                                         | -                                                                                                                               | ++                                                                                                                                                                                                                                                                                                                                                                                                                                                                                                                                                                                                                                                                                                                                  |
| 28 | Moreau: 2002   | Comment | Observational study    | USA    | all age groups | To document the complications associated with CVC use in a home care                                                                                                              | CVC           | Catheter infection was defined as an infectious event involving the intravenous catheter documented through laboratory findings (eg: positive blood and catheter cultures). It can be either a local site infection or a systemic primary BSI.                                                                                            | Identified as more common characteristic but there is no statistical test: so we cannot consider the results as strong evidence | Management of catheter complications through early identification: education: prevention: and timely treatment can result in cost containment in hospital and outpatient settings                                                                                                                                                                                                                                                                                                                                                                                                                                                                                                                                                   |
|    |                | Score   | ++                     | +      | +++            |                                                                                                                                                                                   | +++           | +++                                                                                                                                                                                                                                                                                                                                       |                                                                                                                                 |                                                                                                                                                                                                                                                                                                                                                                                                                                                                                                                                                                                                                                                                                                                                     |
| 29 | Patte: 2005    | Comment | Point prevalence study | France | all age groups | To estimate the prevalence of HAIs in the home care setting: to determine potential risk factors for infection: and to increase staff awareness of HAIs                           | different HAI | Uses CDC definitions for nosocomial infections (1988)                                                                                                                                                                                                                                                                                     | Multivariable analysis:<br>- Advanced age<br>- HHC >30 days<br>- Low Karnofsky index<br>- Urinary catheter<br>- Skin wound      | The authors consider the study as a source of insights that serve as a basis for improving surveillance and prevention                                                                                                                                                                                                                                                                                                                                                                                                                                                                                                                                                                                                              |
|    |                | Score   | +++                    | ++     | +++            |                                                                                                                                                                                   | +++           | ++                                                                                                                                                                                                                                                                                                                                        | +++                                                                                                                             |                                                                                                                                                                                                                                                                                                                                                                                                                                                                                                                                                                                                                                                                                                                                     |
| 30 | Poff: 2014     | Comment | Expert essay           | USA    | NA             | To share how one agency built a meaningful IC program.                                                                                                                            | different HAI | Mentions that used APIC accepted definitions                                                                                                                                                                                                                                                                                              | no info                                                                                                                         | - HHC IC program should focus on the patients or services that are of greatest risk for home care<br>- Track infections that are a direct result of care or services provided by home care and/or identify those                                                                                                                                                                                                                                                                                                                                                                                                                                                                                                                    |

|        |                 |         |                                 |         |                |                                                                                                                                                                                                                                                    |               |                                                                                                                                                                                                                                                                                                                                                                                                                                                                                                                                                  |                                                                                                                                                                                                                                                                     |                                                                                                                                                                                                                                                                         |
|--------|-----------------|---------|---------------------------------|---------|----------------|----------------------------------------------------------------------------------------------------------------------------------------------------------------------------------------------------------------------------------------------------|---------------|--------------------------------------------------------------------------------------------------------------------------------------------------------------------------------------------------------------------------------------------------------------------------------------------------------------------------------------------------------------------------------------------------------------------------------------------------------------------------------------------------------------------------------------------------|---------------------------------------------------------------------------------------------------------------------------------------------------------------------------------------------------------------------------------------------------------------------|-------------------------------------------------------------------------------------------------------------------------------------------------------------------------------------------------------------------------------------------------------------------------|
|        |                 |         |                                 |         |                |                                                                                                                                                                                                                                                    |               |                                                                                                                                                                                                                                                                                                                                                                                                                                                                                                                                                  |                                                                                                                                                                                                                                                                     | that could be decreased by interventions under the control of home care staff<br>- track those infections that occur 3 days after hospital discharge and thereby not erroneously identifying them as HAIs<br>- HHC is in need of standardized tracking and benchmarking |
|        |                 | Score   | +                               | +       |                |                                                                                                                                                                                                                                                    | +++           | ++                                                                                                                                                                                                                                                                                                                                                                                                                                                                                                                                               | -                                                                                                                                                                                                                                                                   | ++                                                                                                                                                                                                                                                                      |
| 3<br>1 | Popp: 2006      | Comment | Qualitative observational study | Germany | all age groups | To assess the implementation of the IC guidelines in home care                                                                                                                                                                                     | different HAI | no info                                                                                                                                                                                                                                                                                                                                                                                                                                                                                                                                          | Qualified infection control staff is lacking; infection control protocols are lacking or are not adapted: the cooperation with family doctors often is problematic: there are deficits in hand hygiene and great deficits with clothing hygiene and waste disposal. | Suggest improvements for some care tasks: e.g.: handling of urinary catheters: infusions and prescription of tracheostomy tubes.                                                                                                                                        |
|        |                 | Score   | ++                              | ++      | +++            |                                                                                                                                                                                                                                                    | +++           | -                                                                                                                                                                                                                                                                                                                                                                                                                                                                                                                                                |                                                                                                                                                                                                                                                                     |                                                                                                                                                                                                                                                                         |
| 3<br>2 | Rinke: 2013     | Comment | Telephone survey                | USA     | children       | To investigate HHC agency CLABSI definitions and prevention policies and compare them to the Joint Commission National Patient Safety Goal: the CDC CLABSI prevention recommendations: and a best-practice central line care bundle for inpatients | CLABSI        | APIC definition                                                                                                                                                                                                                                                                                                                                                                                                                                                                                                                                  | The article does not identify or report risk factors but mentions that in children they are different than in adults                                                                                                                                                | Standardization of an ambulatory CLABSI definition and continued oversight of home health care agency consistency with national recommendations is needed                                                                                                               |
|        |                 | Score   | ++                              | +       | ++             |                                                                                                                                                                                                                                                    | +++           | ++                                                                                                                                                                                                                                                                                                                                                                                                                                                                                                                                               | +                                                                                                                                                                                                                                                                   | +++                                                                                                                                                                                                                                                                     |
| 3<br>3 | Szeinbach: 2014 | Comment | Retrospective chart review      | USA     | >18 years      | To describe catheter complications and outcomes in patients who received HPN therapy                                                                                                                                                               | CLABSI        | CLABSIs were defined as an infection that was documented in the patient charts as a catheter-related infection based on clinical evidence and quantitative blood culture data when appropriate. Secondary BSI attribute to a secondary source were excluded                                                                                                                                                                                                                                                                                      | - Number of days of HPN (for all complications: including CLABSIs)                                                                                                                                                                                                  | - Additional research is needed<br>- A heuristic model for risk assessment including educational workshops should be considered to help caregivers and clinicians identify patients that may be more susceptible to catheter complications                              |
|        |                 | Score   | ++                              | +       | ++             |                                                                                                                                                                                                                                                    | +++           | +++                                                                                                                                                                                                                                                                                                                                                                                                                                                                                                                                              | +++                                                                                                                                                                                                                                                                 | +++                                                                                                                                                                                                                                                                     |
| 3<br>4 | Saqui: 2007     | Comment | Prospective cohort study        | Canada  | all age groups | To determine the rate and types of bloodstream infections in a Canadian HPN program                                                                                                                                                                | CVC           | From CDC: (1) laboratory-confirmed BSI: bacterial or fungal organisms isolated from blood culture: when no apparent infection was occurring at another site; and one of fever (>38 degrees Celsius): chills: or purulent discharge at CVC site; (2) clinical sepsis due to CVC; fever or chills and no or negative blood culture and no apparent infections were occurring at another site; and (3) catheter-related infection: purulent discharge: or erythema (>18 mm) at CVC site or along CVC tunnel site: and no or negative blood culture. | no info                                                                                                                                                                                                                                                             | no info                                                                                                                                                                                                                                                                 |
|        |                 | Score   | +++                             | +       | +++            |                                                                                                                                                                                                                                                    | +++           | ++                                                                                                                                                                                                                                                                                                                                                                                                                                                                                                                                               | -                                                                                                                                                                                                                                                                   | -                                                                                                                                                                                                                                                                       |
| 3<br>5 | Schantz: 2001   | Comment | Expert essay                    | USA     | NA             | Reports the experience of a big HHC agency in                                                                                                                                                                                                      | CVC: CAUTI    | <b>For CVC:</b> one of the following:                                                                                                                                                                                                                                                                                                                                                                                                                                                                                                            | no info                                                                                                                                                                                                                                                             | Development of an IC surveillance system to test definitions: establish                                                                                                                                                                                                 |

|    |                   |         |                          |     |           |                                                                                                                                           |               |                                                                                                                                                                                                                                                                                                                                                                                                                                                                                                                                                                                                                                                                                                                                                                                                                                                                                                                                                                                                                                                                                                                                                                                                                                                                                                                       |                                                                                                               |                                                                                                                                                                                                                                                                                                                                                  |
|----|-------------------|---------|--------------------------|-----|-----------|-------------------------------------------------------------------------------------------------------------------------------------------|---------------|-----------------------------------------------------------------------------------------------------------------------------------------------------------------------------------------------------------------------------------------------------------------------------------------------------------------------------------------------------------------------------------------------------------------------------------------------------------------------------------------------------------------------------------------------------------------------------------------------------------------------------------------------------------------------------------------------------------------------------------------------------------------------------------------------------------------------------------------------------------------------------------------------------------------------------------------------------------------------------------------------------------------------------------------------------------------------------------------------------------------------------------------------------------------------------------------------------------------------------------------------------------------------------------------------------------------------|---------------------------------------------------------------------------------------------------------------|--------------------------------------------------------------------------------------------------------------------------------------------------------------------------------------------------------------------------------------------------------------------------------------------------------------------------------------------------|
|    |                   |         |                          |     |           | IPC programs and its collaboration with CDC and APIC                                                                                      |               | <p>1. Two or more of the following signs/symptoms are present:</p> <ul style="list-style-type: none"> <li>• Erythema associated with the central line</li> <li>• Pain associated with the central line</li> <li>• Purulent drainage from the exit site</li> <li>• Elevated serum white blood cells</li> <li>• Fever of 100.4F or greater</li> <li>• A pathogen or pathogens are cultured from the CVC</li> </ul> <p>2. A physician prescribes a course of antibiotic treatment for a suspected or confirmed central venous catheter infection.</p> <p>3. The physician orders the CVC to be pulled due to suspected or confirmed infection.</p> <p><b>For Bladder Catheter:</b> one of the following:</p> <p>1. There is a change in the character of the urine (hematuria: increasing levels of sediment: foul odor) and two or more of the following signs/symptoms are present:</p> <ul style="list-style-type: none"> <li>• Fever of 100.4 or greater</li> <li>• New flank pain or suprapubic pain</li> <li>• Elevated serum WBCb</li> <li>• Worsening or change in mental status</li> <li>• A pathogen or pathogens are cultured from the urine</li> </ul> <p>2. A physician prescribes a course of antibiotic treatment for a suspected bladder infection (exclude prophylactic or maintenance antibiotics)</p> |                                                                                                               | infection baselines: and develop tools for home health agencies in order to improve patient outcomes                                                                                                                                                                                                                                             |
|    |                   | Score   | +                        | +   |           |                                                                                                                                           |               | +++                                                                                                                                                                                                                                                                                                                                                                                                                                                                                                                                                                                                                                                                                                                                                                                                                                                                                                                                                                                                                                                                                                                                                                                                                                                                                                                   | -                                                                                                             | +++                                                                                                                                                                                                                                                                                                                                              |
| 36 | Shang: 2018       | Comment | Expert essay             | USA | NA        | Reports the state of art on the agenda for infection prevention and control in HHC                                                        | different HAI | no info: refers to APIC definitons                                                                                                                                                                                                                                                                                                                                                                                                                                                                                                                                                                                                                                                                                                                                                                                                                                                                                                                                                                                                                                                                                                                                                                                                                                                                                    | no info                                                                                                       | <ul style="list-style-type: none"> <li>- Previous estimates of infections in HHC are likely to underestimate the problem</li> <li>- increasing HHC services will require better understanding of the topic</li> <li>- Guidelines are based on experts opinion and less research</li> <li>- Need for better understandig of AMR in HHC</li> </ul> |
|    |                   | Score   | +                        | +   |           |                                                                                                                                           | +++           | -                                                                                                                                                                                                                                                                                                                                                                                                                                                                                                                                                                                                                                                                                                                                                                                                                                                                                                                                                                                                                                                                                                                                                                                                                                                                                                                     | -                                                                                                             |                                                                                                                                                                                                                                                                                                                                                  |
| 37 | Sienkiewics: 2008 | Comment | Prospective cohort study | USA | >18 years | To describe the development of a UTI benchmarking project by the Home Care Association of New Jersey for New Jersey's home care agencies. | CAUTI         | use definition APIC                                                                                                                                                                                                                                                                                                                                                                                                                                                                                                                                                                                                                                                                                                                                                                                                                                                                                                                                                                                                                                                                                                                                                                                                                                                                                                   | urinary catheterization                                                                                       | <ul style="list-style-type: none"> <li>- Use standard definitions</li> <li>- Share information between agencies</li> <li>- Breaking old habits is difficult but possible with evidence to support the change in practice</li> <li>- Research for appropriate use of antibiotics ofr UTIs</li> </ul>                                              |
|    |                   | Score   | +++                      | +   | ++        |                                                                                                                                           | +++           | ++                                                                                                                                                                                                                                                                                                                                                                                                                                                                                                                                                                                                                                                                                                                                                                                                                                                                                                                                                                                                                                                                                                                                                                                                                                                                                                                    | ++                                                                                                            | +++                                                                                                                                                                                                                                                                                                                                              |
| 38 | Spires: 2018      | Comment | Retrospective study      | USA | >18 years | To understand the burden of mechanical                                                                                                    | CLABSI        | CLABSI defined utilizing the National Healthcare Safety Network definition                                                                                                                                                                                                                                                                                                                                                                                                                                                                                                                                                                                                                                                                                                                                                                                                                                                                                                                                                                                                                                                                                                                                                                                                                                            | <ul style="list-style-type: none"> <li>- female patients</li> <li>- patients with a CVC with &gt;1</li> </ul> | <ul style="list-style-type: none"> <li>- emphasize the need for improved formal surveillance mechanisms in</li> </ul>                                                                                                                                                                                                                            |

|    |                 |         |                       |         |            |                                                                                                                                        |               |                                                                                                                                                                                             |                                                                                                                                                                                                                                                                                                                                                                                                                                                                                                                                                                                                             |                                                                                                                                                                                                                                                                                                                              |
|----|-----------------|---------|-----------------------|---------|------------|----------------------------------------------------------------------------------------------------------------------------------------|---------------|---------------------------------------------------------------------------------------------------------------------------------------------------------------------------------------------|-------------------------------------------------------------------------------------------------------------------------------------------------------------------------------------------------------------------------------------------------------------------------------------------------------------------------------------------------------------------------------------------------------------------------------------------------------------------------------------------------------------------------------------------------------------------------------------------------------------|------------------------------------------------------------------------------------------------------------------------------------------------------------------------------------------------------------------------------------------------------------------------------------------------------------------------------|
|    |                 |         |                       |         |            | complications and CLABSIs in the outpatients setting and to elucidate their impact on the healthcare system                            |               | of CLABSI as described in January 2014 protocols with a modified timeframe shifting the date of the event to be on or after day 3 of discharge to identify events in the outpatient setting | lumen<br>- patients receiving TPN                                                                                                                                                                                                                                                                                                                                                                                                                                                                                                                                                                           | outpatients with CVCs<br>- Further study and formal surveillance of patients in the outpatient setting would help elucidate modifiable risk factors for CACs and CLABSIs                                                                                                                                                     |
|    |                 | Score   | ++                    | +       | ++         |                                                                                                                                        | +++           | +++                                                                                                                                                                                         | +++                                                                                                                                                                                                                                                                                                                                                                                                                                                                                                                                                                                                         | +++                                                                                                                                                                                                                                                                                                                          |
| 39 | Dibb: 2017      | Comment | Expert essay          | UK      | NA         | Overview of complication in cetheterized patients in HPN                                                                               | CRBSI         | Mentions definitions from CDC: IDSA and ESPEN                                                                                                                                               | - Catheter related venous thrombosis<br>- having had a CRBSI increases the risk of getting another CRBSI                                                                                                                                                                                                                                                                                                                                                                                                                                                                                                    | - The clial diagnosis (with symptoms) can lead to overestimation of infection and overuse of antibioitcs<br>- develop robust catheter care protocols: supported by specialist nurses<br>- training of multidisciplinary teams<br>- proactively search for and treat CRBSI                                                    |
|    |                 | Score   | +                     | ++      |            |                                                                                                                                        | +++           | ++                                                                                                                                                                                          | ++                                                                                                                                                                                                                                                                                                                                                                                                                                                                                                                                                                                                          | ++                                                                                                                                                                                                                                                                                                                           |
| 40 | Donaghy: 2014   | Comment | Survey on home nurses | France  | NA         | To identify key areas of concern in home care nursing practice with a view to improving patient safety and infection control practices | different HAI | no info                                                                                                                                                                                     | - Compliance with legal requirements for clinical waste management<br>- Availability of personal protective equipment<br>- lack of hospital liaison when the patients are discharged                                                                                                                                                                                                                                                                                                                                                                                                                        | Act on the areas of main concern for IPC to improve quality and safety of home care nursing:<br>- Access to continued professional development<br>- Cost and quality of single use materials<br>- Management of clinical waste<br>- Limited prescribing rights<br>- Poor communication between hospital and home care nurses |
|    |                 | Score   | ++                    | ++      |            |                                                                                                                                        |               |                                                                                                                                                                                             |                                                                                                                                                                                                                                                                                                                                                                                                                                                                                                                                                                                                             |                                                                                                                                                                                                                                                                                                                              |
| 41 | Rhinehart: 2001 | Comment | Expert essay          | USA     | NA         | Overview of the state of art at the time and advocacy for surveillance and IPC specific to home care                                   | different HAI | Proposes definitions: see full text. Written before the APIC definitions7                                                                                                                   | - age<br>-chronic illness<br>- immunosuppression                                                                                                                                                                                                                                                                                                                                                                                                                                                                                                                                                            | - need for studies to understand the risk factors<br>- to see if the empiric approach is effective<br>- hospital based IPC professionals must support and guide the home care colleagues to develop evidence-based approach                                                                                                  |
|    |                 | Score   | +                     | +       |            |                                                                                                                                        | +++           | +++                                                                                                                                                                                         | +                                                                                                                                                                                                                                                                                                                                                                                                                                                                                                                                                                                                           | +++                                                                                                                                                                                                                                                                                                                          |
| 42 | Dressen: 2013   | Comment | Systematic review     | Belgium | >=17 years | To provide an overview of CRI rates: causative pathogens and associated risk factors                                                   | CRI           | no info: refers to CRI generic guidelines which apply to all settings                                                                                                                       | <b>Device related:</b><br>- number of lumens<br>- type of vein canulated<br>- infusion ports more than tunneles external catheters<br>- PICCs more than other centrally placed venous access devices<br>- locking with heparine as with normal saline with ethanol<br>- locking with taurolidine is protective<br><b>-Education related:</b><br>- training of patients<br><b>Follow-up factors:</b><br>- being close to a HPN centre<br>- higher number of dependants<br>- if family member takes care<br><b>Patient related:</b><br>- underlying disease<br><b>Time related:</b><br>- more than 7 days HPN | - Use standard definitions<br>- training of patients<br>- use tunneled external chateters<br>- lock with taurolidine intead of heparin<br>- standardise the definitions<br>- register the infections properly                                                                                                                |

|        |                    |         |                                         |       |           |                                                                                                                                                                                                                      |     |                                                                                                                                                                                                                                                                                                                                                     |                                                                         |         |
|--------|--------------------|---------|-----------------------------------------|-------|-----------|----------------------------------------------------------------------------------------------------------------------------------------------------------------------------------------------------------------------|-----|-----------------------------------------------------------------------------------------------------------------------------------------------------------------------------------------------------------------------------------------------------------------------------------------------------------------------------------------------------|-------------------------------------------------------------------------|---------|
|        |                    | Score   | +++                                     | +++   | ++        |                                                                                                                                                                                                                      | +++ | -                                                                                                                                                                                                                                                                                                                                                   | +++                                                                     | +++     |
| 4<br>3 | Santrapia:<br>2016 | Comment | Retrospective<br>observational<br>study | Italy | >18 years | To evaluate:<br>1) CVC infection rate<br>and the type of<br>infectious agent<br>determining CRBSI in<br>a patients in HPN<br>2) predictive risk factr<br>of CVC infection and<br>effectiveness antibiotic<br>therapy | CVC | ESPEN and IDSA guidelines: CRBSI is<br>defined as isolation of the same<br>microorganism from semi-quantitative<br>or quantitative cultures of both blood<br>drawn from the catheter lumen and<br>the blood peripherally drawn of the<br>patient with clinical symptoms of a<br>bloodstream infection and no other<br>apparent source of infection. | - Previous catheterization<br>- presence of an<br>enterocutaneous stoma | no info |
|        |                    | Score   | ++                                      | ++    | ++        |                                                                                                                                                                                                                      |     | ++                                                                                                                                                                                                                                                                                                                                                  | +++                                                                     | -       |

**AE:** Adverse event; **AMR:** Antimicrobial resistance; **APIC:** Association for professionals in infection control and epidemiology; **BSI:** blood stream infection; **CAUTI:** Catheter-associated urinary tract infection; **CDC:** Centers for disease control and prevention; **CRBSI:** Catheter-related bloodstream infection; **CRI:** Catheter-related infection; **CVAD:** Central venous access devices; **CVC:** Central venous catheter; **ED:** Emergency department; **EPA:** United States Environmental Protection Agency; **ESI:** Exit site infection; **ESPEN:** European society from clinical nutrition and metabolism; **HAI:** Healthcare associated infection; **HBHC:** Home based hospital care; **HC:** Health care; **HHC:** Home health care; **HPN:** Home parental nutrition; **HSCT:** Hematopoietic stem cell trans-plantation; **IC:** Infection control; **ICP:** Infection prevention and control; **IDSA:** Infectious Diseases Society of America; **IV:** Intravenous; **M&E:** Monitoring and evaluation; **MDRO:** Multidrug-resistant organisms; **NA:** Not applicable; **OPAT:** Outpatient parenteral antimicrobial therapy; **PD:** Peritoneal Dialysis; **PICC:** Peripherally inserted central venous catheter; **PN:** parenteral; **PPS:** Point prevalence survey; **SOP:** Standard operating procedures; **RAI:** Resident Assessment Instrument; **TPN:** Total parenteral nutrition; **UK:** United Kingdom; **USA:** United states of America; **UTI:** Urinary tract infection; **VAP:** Ventilator-associated pneumonia.

## Supplement VI

### Participant's characteristics of HAI in HHC in-depth interviews

| Profession/ degree        | Gender | Year of HHC experience in present position | Position (relevant for this interview)                                                                                 | Language |
|---------------------------|--------|--------------------------------------------|------------------------------------------------------------------------------------------------------------------------|----------|
| 1. Medical doctor         | F      | 8                                          | Public health manager at policy level (regional)                                                                       | FR       |
| 2. Nurse                  | F      | 14                                         | Public health manager at policy level (regional) – involved in infection prevention                                    | NL       |
| 3. Nurse                  | F      | 10                                         | Researcher in the field of healthcare associated infections at a federal institute                                     | NL       |
| 4. Nurse                  | M      | 6                                          | Coordinator for an organisation of HHC provided by nurses– involved in HAH – also still conduct patient home visits    | FR       |
| 5. Nurse                  | F      | 8                                          | Responsible for HAH for an organisation that provides HHC conducted by nurses – also still conduct patient home visits | FR       |
| 6. Nurse                  | M      | 4                                          | Responsible of team of nurses for an organisation that provides HHC conducted by nurses                                | FR       |
| 7. Nurse                  | F      | -                                          | Staff member at an organisation that provides HHC conducted by nurses – responsible for IPC in HHC – regional level    | NL       |
| 8. Nurse                  | F      | 6                                          | Staff member at an organisation that provides HHC conducted by nurses – responsible for IPC in HHC – provincial level  | NL       |
| 9. Nurse                  | M      | 4.5                                        | Staff member at an organisation that provides HHC conducted by nurses – responsible for IPC in HHC – provincial level  | NL       |
| 10. Microbiologist        | M      | -                                          | Coordinating OPAT                                                                                                      | NL       |
| 11. Microbiologist        | F      | -                                          | Involved in IPC in hospital + Management group for antibiotic therapy                                                  | FR       |
| 12. Nurse                 | F      | -                                          | Coordinating OPAT                                                                                                      | NL       |
| 13. Nurse                 | F      |                                            | Coordinates a hospital at home project + provides HHC as a nurse                                                       | FR       |
| 14. Medical doctor        | F      | 8                                          | GP (in an association with other GPs) conducting home visits + previous experience in academics                        | FR       |
| 15. Medical doctor        | F      | 7                                          | GP (in an association with other GPs) conducting home visits                                                           | FR       |
| 16. Medical doctor        | M      | 12                                         | GP (in an association with other GPs) conducting home visits                                                           | NL       |
| 17. Physiotherapist       | F      | 2                                          | Self-employed independently working physiotherapist conducting home visits                                             | FR       |
| 18. Midwife               | F      | 3                                          | Self-employed independently working midwife conducting routine pre- and post-partum care at home                       | NL       |
| 19. Nurse                 | F      | 5                                          | Self-employed independently working HHC nurse conducting home visits                                                   | NL       |
| 20. Nurse                 | F      | 12                                         | Nurse (working for an association of GPs) conducting home visits                                                       | NL       |
| 21. Lay healthcare worker | M      | -                                          | Family member caring for a patient                                                                                     | FR       |

**D:** Dutch; **F:** female; **FR:** French; **GP:** general practitioner; **HAH:** hospital at home; **HAI:** healthcare associated infections; **HHC:** home healthcare; **M:** male; **OPAT:** outpatient parenteral antimicrobial therapy
